# Supplementary material for: Relationships among shift work, hair cortisol concentration and sleep disorders: a cross-sectional study in China
Source: PubMed Central journal article supplement — BMJ Open. 2020 Nov 14;10(11):e038786. doi: 10.1136/bmjopen-2020-038786 (PMC7668377; doi:10.1136/bmjopen-2020-038786), 2020-11-14
Supplement: bmjopen-2020-038786.draft_revisions.pdf [file bmjopen-2020-038786.draft_revisions.pdf]

# BMJ Open

BMJ Open is committed to open peer review. As part of this commitment we make the peer review history of every article we publish publicly available.

When an article is published we post the peer reviewers' comments and the authors' responses online. We also post the versions of the paper that were used during peer review. These are the versions that the peer review comments apply to.

The versions of the paper that follow are the versions that were submitted during the peer review process. They are not the versions of record or the final published versions. They should not be cited or distributed as the published version of this manuscript.

BMJ Open is an open access journal and the full, final, typeset and author-corrected version of record of the manuscript is available on our site with no access controls, subscription charges or pay-per-view fees (<http://bmjopen.bmj.com>).

If you have any questions on BMJ Open's open peer review process please email [info.bmjopen@bmj.com](mailto:info.bmjopen@bmj.com)

# BMJ Open

## The Relationships among Shift Work, Hair Cortisol Concentration and Sleep Disorders: A Cross-sectional Study in China

|                               |                                                                                                                                                                                                                                                                                                                                                                                                                                                                                                                                                                                                                                                                                                                                                                                                                                                                                                                                                                                                                                                                                                                                                 |
|-------------------------------|-------------------------------------------------------------------------------------------------------------------------------------------------------------------------------------------------------------------------------------------------------------------------------------------------------------------------------------------------------------------------------------------------------------------------------------------------------------------------------------------------------------------------------------------------------------------------------------------------------------------------------------------------------------------------------------------------------------------------------------------------------------------------------------------------------------------------------------------------------------------------------------------------------------------------------------------------------------------------------------------------------------------------------------------------------------------------------------------------------------------------------------------------|
| Journal:                      | <i>BMJ Open</i>                                                                                                                                                                                                                                                                                                                                                                                                                                                                                                                                                                                                                                                                                                                                                                                                                                                                                                                                                                                                                                                                                                                                 |
| Manuscript ID                 | bmjopen-2020-038786                                                                                                                                                                                                                                                                                                                                                                                                                                                                                                                                                                                                                                                                                                                                                                                                                                                                                                                                                                                                                                                                                                                             |
| Article Type:                 | Original research                                                                                                                                                                                                                                                                                                                                                                                                                                                                                                                                                                                                                                                                                                                                                                                                                                                                                                                                                                                                                                                                                                                               |
| Date Submitted by the Author: | 25-Mar-2020                                                                                                                                                                                                                                                                                                                                                                                                                                                                                                                                                                                                                                                                                                                                                                                                                                                                                                                                                                                                                                                                                                                                     |
| Complete List of Authors:     | Zhang, Yu; Nantong University, Department of Epidemiology and Medical Statistics, School of Public Health<br>Shen, Jiayang; Nantong University, Department of Epidemiology and Medical Statistics, School of Public Health<br>Zhou, Ziqi; Nantong University, Department of Epidemiology and Medical Statistics, School of Public Health<br>Sang, Lingli; Nantong University, Department of Epidemiology and Medical Statistics, School of Public Health<br>Zhuang, Xun; Nantong University, Department of Epidemiology and Medical Statistics, School of Public Health<br>Chu, Minjie; Nantong University, Department of Epidemiology and Medical Statistics, School of Public Health<br>Tian, Tian; Nantong University, Department of Epidemiology and Medical Statistics, School of Public Health<br>Xiao, Jing; Nantong University, Department of Occupational Environmental Toxicology, School of Public Health<br>Lian, Yulong; Nantong university, Division of Occupational and Environmental Health, College of Public Health; Xinjiang Medical University, Division of Occupational and Environmental Health, College of Public Health |
| Keywords:                     | SLEEP MEDICINE, OCCUPATIONAL & INDUSTRIAL MEDICINE, EPIDEMIOLOGY                                                                                                                                                                                                                                                                                                                                                                                                                                                                                                                                                                                                                                                                                                                                                                                                                                                                                                                                                                                                                                                                                |
|                               |                                                                                                                                                                                                                                                                                                                                                                                                                                                                                                                                                                                                                                                                                                                                                                                                                                                                                                                                                                                                                                                                                                                                                 |

SCHOLARONE™  
Manuscripts

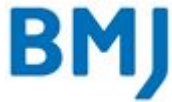

I, the Submitting Author has the right to grant and does grant on behalf of all authors of the Work (as defined in the below author licence), an exclusive licence and/or a non-exclusive licence for contributions from authors who are: i) UK Crown employees; ii) where BMJ has agreed a CC-BY licence shall apply, and/or iii) in accordance with the terms applicable for US Federal Government officers or employees acting as part of their official duties; on a worldwide, perpetual, irrevocable, royalty-free basis to BMJ Publishing Group Ltd ("BMJ") its licensees and where the relevant Journal is co-owned by BMJ to the co-owners of the Journal, to publish the Work in this journal and any other BMJ products and to exploit all rights, as set out in our [licence](#).

The Submitting Author accepts and understands that any supply made under these terms is made by BMJ to the Submitting Author unless you are acting as an employee on behalf of your employer or a postgraduate student of an affiliated institution which is paying any applicable article publishing charge ("APC") for Open Access articles. Where the Submitting Author wishes to make the Work available on an Open Access basis (and intends to pay the relevant APC), the terms of reuse of such Open Access shall be governed by a Creative Commons licence – details of these licences and which [Creative Commons](#) licence will apply to this Work are set out in our licence referred to above.

Other than as permitted in any relevant BMJ Author's Self Archiving Policies, I confirm this Work has not been accepted for publication elsewhere, is not being considered for publication elsewhere and does not duplicate material already published. I confirm all authors consent to publication of this Work and authorise the granting of this licence.

1  
2  
3  
4 **The Relationships among Shift Work, Hair Cortisol Concentration and Sleep Disorders: A**  
5  
6 **Cross-sectional Study in China**

7 Yu Zhang<sup>1</sup>, Jiayang Shen<sup>1</sup>, Ziqi Zhou<sup>1</sup>, Lingli Sang<sup>1</sup>, Xun Zhuang<sup>1</sup>, Minjie Chu<sup>1</sup>, Tian Tian<sup>1</sup>, Jing  
8 Xiao<sup>2</sup>, Yulong Lian<sup>1</sup>  
9

10  
11 <sup>1</sup> Department of Epidemiology and Medical Statistics, School of Public Health, Nantong University,  
12 Nantong, Jiangsu, China  
13

14  
15 <sup>2</sup> Department of Occupational Environmental Toxicology, School of Public Health, Nantong  
16 University, Nantong, Jiangsu, China  
17

18  
19  
20 **Corresponding author:**

21 Yulong Lian

22  
23  
24 Postal address: Se Yuan Road, No. 9, Nantong, 226001, Jiangsu, China

25  
26 Phone: +86-0513-85012910

27  
28 Fax: N/A

29  
30 Email: lianyulong444@163.com

31  
32 **Key words:** shift work, hair cortisol concentration, sleep disorders, mediating effect

33  
34 **Word count:** 3141  
35  
36  
37  
38  
39  
40  
41  
42  
43  
44  
45  
46  
47  
48  
49  
50  
51  
52  
53  
54  
55  
56  
57  
58  
59  
60

# The Relationships among Shift Work, Hair Cortisol Concentration and Sleep Disorders: A Cross-sectional Study in China

## Abstract

**Objective:** The present study was designed to demonstrate the relationships among shift work, hair cortisol concentration (HCC) and sleep disorders.

**Methods:** This was a cross-sectional study of petroleum workers in Xinjiang, China, in 2013. 435 individuals including 164 males and 271 females participated in the research. Information on shift work was collected by a self-administered questionnaire. HCC was determined using an automatic radioimmunoassay instrument. Sleep quality was measured on the Pittsburgh sleep quality index (PSQI) scale.

**Results:** Shiftwork was associated with an increased risk of sleep disorders compared with the fixed day shift [two shifts: Odds ratio (OR)=3.114, 95% confidence intervals (95%CI)=1.568–6.186; three shifts: OR=2.868, 95%CI=1.376–5.978; four shifts: OR=2.215, 95%CI=1.174–4.177; others: OR=3.881, 95%CI=1.360–11.076]. Workers with different shift patterns had higher HCC levels than day workers (fixed day shift:  $0.368 \pm 0.218$ ; two shifts:  $0.575 \pm 0.166$ ; three shifts:  $0.498 \pm 0.214$ ; four shifts:  $0.581 \pm 0.191$ ; others:  $0.556 \pm 0.123$ ) and higher HCC was associated with the occurrence of sleep disorders (OR=1.196, 95%CI=1.916–2.240). The mediating effect of HCC on the relationship between shift work and sleep disorders was 0.049.

**Conclusion:** We found that, when compared with the fixed day shift, shiftwork was associated with both the higher HCC, and also with an increased risk of sleep disorders. Higher HCC was associated with the occurrence of sleep disorders. In addition, HCC had mediating effect in shift work and sleep disorders. Thus, HCC can be considered as an early marker of shiftwork circadian disruption to early detection and management of sleep disorders.

**Keywords:** shift work, sleep disorders, HCC, mediating effect

### Strengths and limitations of this study:

- As we know, this is the first study researching the mediating effect of HCC between shift work and sleep disorders.
- We used HCC reflecting the long-term cortisol exposure which is important in the etiology of chronic disease related to HPA axis activation.
- Cross-sectional study design does not allow establishing causality among shiftwork, HCC and sleep disorders.
- Some important confounding factors, such as depression and stress, were not taken into account.

## Introduction:

Sleep disorders are very common in the general population. A study of 150,000 residents of 36 US states found that the prevalence of sleep disorders for men ranged from 13.7% to 18.1%, and for women the prevalence ranged from 17.7% to 25.1%<sup>1</sup>. Shift work is an indispensable part of the lifestyle of a large proportion of the population. In Europe, about 20% of the working population, on average, work shifts although the percentage is slightly lower, at 14.7%, in Switzerland<sup>2</sup>. The percentage in Asia has been estimated to be at least 30%<sup>3</sup>. Shift work has been shown to be one of the causes of sleep disorders. The prevalence of sleep disorders in shift workers (39.0%) was significantly higher than that in day workers (24.6%) in the study by Kerkhof<sup>4</sup>. A statistically significant increase in risk of sleep disorders [Odds ratio (OR)=8.8] was observed in a study of 403 females employed in shift work and 205 females employed in administrative units of the same enterprise<sup>5</sup>. There are few studies on the relationship between different shift patterns and sleep disorders, although the findings may allow enterprises to choose shift patterns reasonably. Therefore, it is important to study this question.

Cortisol is a glucocorticoid hormone that is released by the adrenal cortex through stimulation of the hypothalamic-pituitary-adrenal (HPA) axis<sup>6</sup>. It is commonly known that cortisol is a stress hormone as it is released in larger amounts under pressure<sup>7</sup>. Present studies suggest that sleep disorders are associated with cortisol concentrations. A study testing the association between sleep and neuroendocrine activity in children proposed that the lower the children's sleep sufficiency, the higher the overall level of salivary cortisol and the smaller the decrease salivary cortisol during the day<sup>8</sup>. Insomniacs with a high degree of objective sleep disorders, when compared with individuals with a low degree of sleep disturbance, secreted a higher level of cortisol<sup>9</sup>. The secretion of cortisol fluctuates according to the circadian rhythm, and the concentration of cortisol in blood, urine and saliva is easily affected by external factors so that it does not reflect the cortisol exposure of individuals accurately<sup>10</sup>. Therefore, we used hair cortisol concentration (HCC) instead of cortisol concentrations in blood, urine and saliva in this study because HCC is stable and can reflect the long-term cortisol exposure of subjects<sup>10</sup>. Manenschijn et al. found that shift workers had higher hair cortisol levels than day workers: 48.53 pg/mg hair vs. 26.42 pg/mg hair ( $p<0.001$ ) in the group under 40. But in the group over 40, there was no

1  
2  
3  
4 significant difference in HCC between shift workers and day workers<sup>11</sup>. Janssens et al. found a  
5 significantly lower mean HCC in shift workers compared with day workers, adjusted for age<sup>12</sup>,  
6 which is inconsistent with the proposed mechanism and most similar studies. The reasons are  
7 worth exploring.  
8  
9

10  
11 Based on previous researches, we studied different shift patterns separately and put forward  
12 the following hypotheses: (1) shift work is associated with sleep disorders; (2) employees with  
13 sleep disorders have a higher level of HCC; (3) HCC is a mediating variable between shift work  
14 and sleep disorders. It is also worth investigating whether the difference in HCC levels between  
15 shift workers and day workers is age-related.  
16  
17  
18  
19  
20

## 21 22 **Methods**

### 23 24 25 **Population**

26  
27 460 workers of 3 petroleum administrations in Karamay city of Xinjiang were randomly  
28 selected as a target group for the study. The sampling method was as follows: There were 5  
29 factories in the 3 petroleum administrations, each with 4 teams and a total of 20 teams. These 20  
30 teams were numbered, and randomly selected 6 teams according to random number table method.  
31 A total of 460 petroleum workers from 10 teams were used as research objects. The inclusion  
32 criteria were as follows: (i) participants aged 20–60; (ii) those who had worked for more than 1  
33 year. The exclusion criteria were as follows: (i) participants with incomplete questionnaire data  
34 (n=15); (ii) participants with previous depression, schizophrenia and other diseases that may lead  
35 to sleep disorders (n=2); (iii) participants with hair shorter than 3cm (n=8). Finally, 435  
36 individuals, 164 men and 271 women, participated in this research and their hair samples were  
37 collected.  
38  
39  
40  
41  
42  
43  
44  
45  
46  
47

### 48 49 **Shift work**

50  
51 Information on the shift work was obtained using a questionnaire. We defined the normal day  
52 shift employees as having a fixed day shift, and the others as undertaking shift work. Shift work  
53 was divided into “two shifts,” “three shifts,” “four shifts” and “others” according to the shift  
54 mode. “Two shifts” included a day shift and a night shift, 12h per shift. Considering the biological  
55 rhythm of employee, two shifts were rotated once for one or two weeks, which means that an  
56 employee would work around the clock at least twice a month. This shift pattern may lead to  
57  
58  
59  
60



1  
2  
3  
4 longer working hours and make workers more tired. “Three shifts” meant that employees were  
5 divided into three groups. There were two groups of employees worked every day (divided into  
6 day shift and night shift, 12h per shift) and one group rest. They worked in turn according to the  
7 arrangement order. “Four shifts” meant that employees were divided into four groups, three  
8 groups worked (divided into day shift, mid shift and night shift, 8h per shift) and one rest.  
9  
10  
11  
12  
13 “Others” referred to all shift patterns except the modes mentioned above.  
14

### 15 **Sleep disorders**

16  
17 The Pittsburgh sleep quality index (PSQI) scale was used to assess the sleep quality of the  
18 participants over the past month. It consists of 19 self-evaluation items generating seven  
19 components: subjective sleep quality, sleep latency, sleep duration, habitual sleep efficiency, sleep  
20 disturbances, use of sleeping medication and daytime dysfunction, and five items evaluated by  
21 family members that were not counted in the total score. Each of the seven components was  
22 scored 0–3, and the total score range was 0–21. Higher scores indicated worse sleep quality. It was  
23 considered as sleep disorder if the cumulative score was more than seven.  
24  
25  
26  
27  
28  
29

### 30 **Hair cortisol concentration**

31  
32 Hair samples of 2–3 cm and 20–30 mg were collected from the hair roots of the participants.  
33  
34 The pretreatment process for hair sampling followed the experimental procedures described in the  
35 patent “a pre-treatment method for detecting cortisol content in hair.” The hair samples were  
36 washed and exfoliated with 2–3 mL isopropanol for 5 min; the exfoliated hair samples were  
37 frozen with liquid nitrogen for more than 4 h and then crushed; the crushed hair samples were  
38 placed in centrifuge tubes, 5 mL methanol solution and 3 mL ether solution (methanol: ether  
39 volume ratio 5:3) added, and placed in a water bath at 50.8°C for 16 h for extraction and  
40 incubation. The analytical process involved mixing the hair debris by inversion several times and  
41 centrifugation at low speed (3,500 rpm) for 15 min. The supernatant was removed and put it into a  
42 4 mL Eppendorf (EP) tube; a nitrogen blower was used to dry the mixture after extraction; 2 mL  
43 phosphate buffer solution was added, and the sample placed in a refrigerator at -4°C for cold  
44 storage until the test day. A radioimmunoassay kit for detecting iodine [<sup>125</sup>I] cortisol and an  
45 automatic radioimmunoassay instrument were used to determine HCC.  
46  
47  
48  
49  
50  
51  
52  
53  
54  
55  
56  
57

### 58 **Covariates**

59 In this study, we collected covariates, including gender, age, ethnicity, education, marital  
60

1  
2  
3  
4 status, monthly income (yuan), physical exercise, smoking status, alcohol consumption, length of  
5  
6 service (years) and type of work, using a self-administered questionnaire. Age was divided into  
7  
8 “<30,” “30–,” “40–” years; ethnicity was divided into “Han,” “Uighur” and “others”; education  
9  
10 was divided into “high school and below,” “junior college” and “bachelor degree and above”;  
11  
12 marital status was divided into “single,” “married” and “others (divorced, widowed and  
13  
14 remarried)”; monthly income (yuan) was divided into “<3,000,” “3,000–5,000” and “≥5000”;  
15  
16 physical exercise was divided into “never,” “<3 times/week,” “≥3 times/week” and “irregular”  
17  
18 according to the frequency; smoking status was divided into “frequently” (≥1 cigarette/day),  
19  
20 “occasionally” (<1 cigarette/day), “quitted” and “never”; alcohol consumption was quantified in  
21  
22 “g” for beer, rice wine, red wine, white wine, etc. and divided into “frequently” (≥8 g/day),  
23  
24 “occasionally,” (<8 g/day) “quitted” and “never”; length of service (years) was divided into “<20”  
25  
26 and “≥20”; type of work was divided into “oil transportation,” “oil extraction,” “refinery” and  
27  
28 “others.”

### 29 30 **Statistical analysis**

31  
32 Hair cortisol concentrations were log transformed to obtain a normal distribution and are  
33  
34 presented in Table 1 as the median [with first quartile (Q1)-third quartile (Q3)] of the original  
35  
36 HCC and mean ± SD of the transformed variable. Chi-squared tests were used to calculate  
37  
38 descriptive statistics for demographic variables, compared between those with and without sleep  
39  
40 disorders. Variance analysis and the student *t* test were used to estimate the relationships between  
41  
42 demographic variables and transformed HCC. Logistic regression was used to estimate the  
43  
44 difference in the prevalence of sleep disorders between workers with different shift patterns and  
45  
46 day workers. Causal steps approach<sup>13</sup> and Stata command KHB which was developed specifically  
47  
48 for categorical variables were used to verify whether HCC was a mediating variable between shift  
49  
50 work and sleep disorders.  $\alpha=0.05$  (two-tailed).

### 51 52 **Ethical considerations**

53  
54 All the participants signed an informed consent form after learning about research-related  
55  
56 information. The study was approved by the Ethics Committees of Nantong University(2013-  
57  
58 L073).

### 59 60 **Patient and Public Involvement**

No patient involved.

## Results

A total of 435 employees were included in this research: 164 males and 271 females, accounting for 37.70% and 62.30%, respectively. The age range was 20–58 years, with an average age of  $38.32 \pm 7.42$  years. The original HCC range was 1.066–9.671 ng/g hair and the median was 3.200 (2.148–4.711) ng/g hair. The range of the transformed HCC variable was 0.028–0.985, and the mean was  $0.504 \pm 0.220$ . To investigate whether the demographic characteristics were associated with sleep disorders or with HCC level, we analyzed these factors separately but we didn't find significant differences (Table 1).

In present study, transformed HCC levels of workers with different shift patterns were significantly higher than that of fixed day shift workers (fixed day shift:  $0.368 \pm 0.218$ ; two shifts:  $0.575 \pm 0.166$ ; three shifts:  $0.498 \pm 0.214$ ; four shifts:  $0.581 \pm 0.191$ ; others:  $0.556 \pm 0.123$ ). But we didn't find the relationship among workers with two shifts, three shifts, four shifts and others (Table 2).

Different shift patterns had higher ORs for sleep disorders compared with the fixed day shift (two shifts: OR=2.937, 95% confidence intervals (95%CI)=1.549–5.567,  $p=0.001$ ; three shifts: OR=2.644, 95%CI=1.317–5.306,  $p=0.006$ ; four shifts: OR=2.125, 95%CI=1.171–3.858,  $p=0.013$ ; others: OR=3.495, 95%CI=1.324–9.221,  $p=0.011$ ) (Table 3, Model 1). In order to control the influence of demographic characteristics on sleep disorders, we set up logistic regression models to adjust for covariates, and the results remained statistically significant (Table 3, Model 2 and Model 3). However, there was no significant difference in the prevalence of sleep disorders among workers with two shifts, three shifts, four shifts and others.

The median original HCC of participants with sleep disorders was 4.449ng/g, while it was 2.789ng/g for those without sleep disorders. Higher HCC was associated with the occurrence of sleep disorders. (OR=1.916, 95%CI=1.639–2.240,  $p<0.001$ ) (Table 3).

We used KHB command to assess the mediating effect of HCC between shift work and sleep disorders. The logistic regression results between shift work and sleep disorders showed that the regression coefficient was statistically significant ( $c=0.043$ ,  $p=0.006$ ). The coefficients between shift work and HCC, HCC and sleep disorders were also significant ( $a=0.426$ ,  $p<0.001$ ;  $b=1.911$ ,  $p<0.001$ ). The coefficient was not significant when HCC was added as a mediator ( $c'=-0.006$ ,

1  
2  
3  
4  $p=0.690$ ) (Figure 1) and the mediating effect of HCC was 0.049 ( $p<0.001$ ) (Table 4). This means  
5  
6 that mediating effect of HCC between shift work and sleep disorders was significant. All the  
7  
8 results were obtained after controlling the covariates.  
9  
10  
11  
12  
13  
14  
15  
16  
17  
18  
19  
20  
21  
22  
23  
24  
25  
26  
27  
28  
29  
30  
31  
32  
33  
34  
35  
36  
37  
38  
39  
40  
41  
42  
43  
44  
45  
46  
47  
48  
49  
50  
51  
52  
53  
54  
55  
56  
57  
58  
59  
60

For peer review only

Table 1 The relationships among demographic characteristics, sleep disorders and HCC level

| Variables                 | Sleep Disorders     |                    | <i>p</i> | Original HCC<br>Median(ng/g)<br>(Q <sub>1</sub> -Q <sub>3</sub> ) | Transformed HCC<br>Mean±SD | <i>p</i> |
|---------------------------|---------------------|--------------------|----------|-------------------------------------------------------------------|----------------------------|----------|
|                           | Yes [n (%)] (n=124) | No [n (%)] (n=311) |          |                                                                   |                            |          |
| <b>Sex</b>                |                     |                    |          |                                                                   |                            |          |
| Male                      | 40(32.26)           | 124(39.87)         | 0.139    | 3.333<br>(2.223-5.085)                                            | 0.516±0.222                | 0.403    |
| Female                    | 84(67.74)           | 187(60.13)         |          | 3.051<br>(2.107-4.551)                                            | 0.497±0.219                |          |
| <b>Age</b>                |                     |                    |          |                                                                   |                            |          |
| <30                       | 19(15.32)           | 46(14.79)          | 0.603    | 3.412<br>(2.425-4.490)                                            | 0.526±0.207                | 0.323    |
| 30-                       | 40(32.26)           | 116(37.30)         |          | 2.954<br>(2.096-4.880)                                            | 0.484±0.219                |          |
| 40-                       | 65(52.42)           | 149(47.91)         |          | 3.245<br>(2.200-4.715)                                            | 0.512±0.224                |          |
| <b>Ethnicity</b>          |                     |                    |          |                                                                   |                            |          |
| Han                       | 95(76.61)           | 248(79.74)         | 0.718    | 3.168<br>(2.099-4.730)                                            | 0.499±0.223                | 0.495    |
| Uyghur                    | 14(11.29)           | 33(10.61)          |          | 3.279<br>(2.282-4.062)                                            | 0.510±0.211                |          |
| Others                    | 15(12.10)           | 30(9.65)           |          | 3.626<br>(2.562-4.838)                                            | 0.540±0.203                |          |
| <b>Education</b>          |                     |                    |          |                                                                   |                            |          |
| High school and below     | 33(26.61)           | 68(21.86)          | 0.338    | 3.583<br>(2.259-4.860)                                            | 0.523±0.233                | 0.627    |
| Junior college            | 72(58.06)           | 204(65.59)         |          | 3.119<br>(2.130-4.673)                                            | 0.498±0.216                |          |
| Bachelor degree and above | 19(15.32)           | 39(12.54)          |          | 3.181<br>(2.331-4.193)                                            | 0.503±0.218                |          |

|                                        |           |            |       |                        |             |       |  |
|----------------------------------------|-----------|------------|-------|------------------------|-------------|-------|--|
| <b>Marital status</b>                  |           |            |       |                        |             |       |  |
| Spinsterhood                           | 13(10.48) | 40(12.86)  | 0.716 | 3.412<br>(2.419-5.178) | 0.533±0.211 |       |  |
| Married                                | 95(76.61) | 227(72.99) |       | 3.186<br>(2.161-4.631) | 0.507±0.218 | 0.236 |  |
| Others<br>(divorce, widow and remarry) | 16(12.90) | 44(14.15)  |       | 3.351<br>(1.874-4.710) | 0.465±0.236 |       |  |
| <b>Monthly income(yuan)</b>            |           |            |       |                        |             |       |  |
| <3000                                  | 30(24.19) | 63(20.26)  |       | 3.200<br>(2.199-5.065) | 0.515±0.227 |       |  |
| 3000-5000                              | 87(70.16) | 228(73.31) | 0.653 | 3.159<br>(2.136-4.551) | 0.497±0.216 | 0.430 |  |
| ≥5000                                  | 7(5.65)   | 20(6.43)   |       | 3.645<br>(2.212-5.324) | 0.549±0.239 |       |  |
| <b>Physical exercise</b>               |           |            |       |                        |             |       |  |
| Never                                  | 30(24.19) | 70(22.51)  |       | 3.520<br>(2.064-4.945) | 0.511±0.225 |       |  |
| <3 times/week                          | 34(27.42) | 109(34.05) | 0.451 | 2.943<br>(2.099-4.236) | 0.482±0.215 | 0.497 |  |
| ≥3 times/week                          | 17(13.71) | 33(10.61)  |       | 3.372<br>(2.378-5.406) | 0.525±0.226 |       |  |
| Irregular                              | 43(34.68) | 99(31.83)  |       | 3.235<br>(2.279-4.828) | 0.514±0.220 |       |  |
| <b>Smoking status</b>                  |           |            |       |                        |             |       |  |
| Frequently                             | 19(15.32) | 64(20.58)  |       | 3.159<br>(2.111-4.964) | 0.497±0.219 |       |  |
| Occasionally                           | 13(10.48) | 40(12.86)  | 0.466 | 3.279<br>(2.251-4.810) | 0.507±0.220 | 0.990 |  |
| Quitted                                | 7(5.65)   | 18(5.79)   |       | 2.834<br>(2.144-5.174) | 0.505±0.250 |       |  |
| Never                                  | 85(68.55) | 189(60.77) |       | 3.194<br>(2.149-4.617) | 0.506±0.219 |       |  |
| <b>Alcohol consumption</b>             |           |            |       |                        |             |       |  |
| Frequently                             | 8(6.45)   | 25(8.04)   | 0.645 | 3.210                  | 0.502±0.230 | 0.817 |  |

|  |                                  |           |            |               |             |       |
|--|----------------------------------|-----------|------------|---------------|-------------|-------|
|  |                                  |           |            | (2.179-5.084) |             |       |
|  | Occasionally                     | 49(39.52) | 118(37.94) | 3.342         | 0.516±0.220 |       |
|  |                                  |           |            | (2.289-5.063) |             |       |
|  | Quitted                          | 5(4.03)   | 18(5.79)   | 2.825         | 0.482±0.253 |       |
|  |                                  |           |            | (2.136-5.147) |             |       |
|  | Never                            | 62(50.00) | 150(48.23) | 3.149         | 0.498±0.216 |       |
|  |                                  |           |            | (2.096-4.488) |             |       |
|  | <b>Length of service (years)</b> |           |            |               |             |       |
|  | <20                              | 61(49.19) | 171(54.98) | 3.109         | 0.496±0.220 |       |
|  |                                  |           |            | (2.117-4.824) |             | 0.433 |
|  | ≥20                              | 63(50.81) | 140(45.02) | 3.279         | 0.513±0.221 |       |
|  |                                  |           |            | (2.212-4.678) |             |       |
|  | <b>Type of work</b>              |           |            |               |             |       |
|  | Oil transportation               | 67(54.03) | 196(63.02) | 3.174         | 0.495±0.219 |       |
|  |                                  |           |            | (2.099-4.660) |             |       |
|  | Oil extraction                   | 4(3.23)   | 13(4.18)   | 2.852         | 0.482±0.266 |       |
|  |                                  |           |            | (2.150-4.846) |             | 0.626 |
|  | Refinery                         | 19(15.32) | 46(14.79)  | 3.526         | 0.528±0.230 |       |
|  |                                  |           |            | (2.183-5.155) |             |       |
|  | Others                           | 34(27.42) | 56(18.01)  | 3.330         | 0.518±0.209 |       |
|  |                                  |           |            | (2.428-4.342) |             |       |

Table 2 The relationship between shift work and HCC

| Shift work      | Original HCC                                      | Transformed HCC          | <i>p</i> |
|-----------------|---------------------------------------------------|--------------------------|----------|
|                 | Median(ng/g)<br>(Q <sub>1</sub> -Q <sub>3</sub> ) | Mean±SD                  |          |
| Fixed day shift | 2.151(1.550-3.210)                                | 0.368±0.218              | <0.001** |
| Two shifts      | 3.611(2.940-5.250)                                | 0.575±0.166 <sup>a</sup> |          |
| Three shifts    | 3.244(2.009-4.592)                                | 0.498±0.214 <sup>a</sup> |          |
| Four shifts     | 3.839(2.626-5.203)                                | 0.581±0.191 <sup>a</sup> |          |
| others          | 3.376(2.162-5.813)                                | 0.556±0.123 <sup>a</sup> |          |

\*\* :  $p < 0.001$

<sup>a</sup>: there was no significant difference between groups marked with the same letter

Table 3 Sleep disorders in workers on different shift patterns adjusted for covariates, compared with fixed day shift

| Shift work      | Model 1                          |          | Model 2                           |          | Model 3                           |          |
|-----------------|----------------------------------|----------|-----------------------------------|----------|-----------------------------------|----------|
|                 | OR (95%CI)                       | <i>P</i> | OR (95%CI)                        | <i>P</i> | OR (95%CI)                        | <i>P</i> |
| Fixed day shift | 1.000                            |          | 1.000                             |          | 1.000                             |          |
| Two shifts      | 2.937 <sup>a</sup> (1.549-5.567) | 0.001*   | 3.101 <sup>b</sup> (1.582-6.078)  | 0.001*   | 3.114 <sup>c</sup> (1.568-6.186)  | 0.001*   |
| Three shifts    | 2.644 <sup>a</sup> (1.317-5.306) | 0.006*   | 2.863 <sup>b</sup> (1.391-5.894)  | 0.004*   | 2.868 <sup>c</sup> (1.376-5.978)  | 0.005*   |
| Four shifts     | 2.125 <sup>a</sup> (1.171-3.858) | 0.013*   | 2.229 <sup>b</sup> (1.190-4.176)  | 0.012*   | 2.215 <sup>c</sup> (1.174-4.177)  | 0.014*   |
| Others          | 3.495 <sup>a</sup> (1.324-9.221) | 0.011*   | 3.737 <sup>b</sup> (1.328-10.512) | 0.012*   | 3.881 <sup>c</sup> (1.360-11.076) | 0.011*   |

Model 1: unadjusted.

Model 2: adjusted for sex, age, ethnicity, education, marital status, monthly income, type of work, and length of service

Model 3: additionally adjusted for smoking status, alcohol consumption and physical exercise

<sup>a</sup>, <sup>b</sup>, <sup>c</sup>: there was no significant difference between groups marked with the same letter \*:  $p < 0.05$



Table 4 The relationship between original HCC and sleep disorders

|                     | Sleep disorders     |          |                     |          |                    |          |
|---------------------|---------------------|----------|---------------------|----------|--------------------|----------|
|                     | Model 1             |          | Model 2             |          | Model 3            |          |
|                     | OR (95%CI)          | <i>p</i> | OR (95%CI)          | <i>p</i> | OR (95%CI)         | <i>p</i> |
| <b>Original HCC</b> | 1.844 (1.603-2.121) | <0001**  | 1.916 (1.642-2.235) | <0001**  | 1.916(1.639-2.240) | <0001**  |

Model 1: unadjusted.

Model 2: adjusted for sex, age, ethnicity, education, marital status, monthly income, type of work, length of service and shift work

Model 3: additionally adjusted for smoking status, alcohol consumption and physical exercise

\*\*:*p*<0.001

Table 5 The mediating effect of HCC between shift work and sleep disorders

|                   | Sleep disorders             | $\beta$ | SE( $\beta$ ) | <i>z</i> | <i>p</i> | 95%CI        |
|-------------------|-----------------------------|---------|---------------|----------|----------|--------------|
| <b>Shift work</b> | <b>Total effect (c)</b>     | 0.043   | 0.015         | 2.76     | 0.006*   | 0.012-0.073  |
|                   | <b>Direct effect (c')</b>   | -0.006  | 0.016         | -0.40    | 0.690    | -0.038-0.025 |
|                   | <b>Indirect effect (ab)</b> | 0.049   | 0.009         | 5.47     | <0.001** | 0.032-0.067  |

\*:*p*<0.05,

\*\*:*p*<0.001

## Discussion

This study mainly found that shift work was related to a higher prevalence of sleep disorders, and that the HCC levels of shift workers were higher than that of day workers. We also found that HCC level of workers with sleep disorders was significantly higher than those without sleep disorders. In addition, shift work leads to sleep disorders by affecting HCC.

In this study, the risk of sleep disorders in workers performing shift work was significantly higher than that of fixed day shift workers, which is consistent with many previous studies. Drake et al. found that the incidence of insomnia in night workers and shift workers was 18.5% and 15.7%, respectively, far higher than that in day shift workers (8.6%)<sup>14</sup>. A prospective study of 1908 individuals showed that entering a shift increased the risk of difficulty falling asleep, while leaving the shift reduced the risk<sup>15</sup>. A 5-year cohort study of 2351 Danish employees found that, compared with daytime work, the risk of sleep disorders in those with irregular working hours is higher<sup>16</sup>. Another study analyzed different shift patterns separately and showed that workers on two shifts and three shifts exhibited higher risks of sleep disorders than fixed day shift workers, and that the influence of three shifts was stronger than that of two shifts<sup>17</sup>. Workers on two shifts have more fixed working hours than other shift patterns and can extend sleep time during their days off<sup>18</sup>. However, we found no difference among workers on two shifts, three shifts, four shifts and others. While two shifts can prolong working time and make more tired, other shift patterns may increase shift frequency, which may lead to irregular sleep and sleep disorders.

We analyzed the different shift patterns separately and found that workers with different shift patterns had higher HCC levels than that of the fixed day shift workers. But the differences between different shift patterns were not statistically significant. It is partly consistent with the previous study, in which the researchers observed elevated mean HCC in participants who had a rotating shift schedule compared with those who worked only during the day at young age, but the difference was not statistically significant among participants over 40. The study inferred that it may be related with healthy work effect and selection bias<sup>11</sup>. But in another study, the difference by age group was not statistically significant<sup>19</sup>. The present finding indicates that HCC has no relation with age and the adaptability of older employees to shift work is no different from that of younger employees. And it is consistent with a review, in which the researchers didn't find the evidence for suggestion of more shift work problems. But our finding of the relationship between shift work and HCC is inconsistent with a study on the relationship of occupational stress and HCC among Belgian workers, including 102 participants, which showed that employees working a fixed day shift have significantly higher HCC levels than those undertaking shift work<sup>12</sup>. A possible reason may be that the population studied was relatively small, which may have led to poor reliability of the result. Another reason may be that the sample consisted of all those workers who were not working in a regular daytime work regime.

We found that higher HCC was associated with the occurrence of sleep disorders. Although

1  
2  
3 there was no report on the relationship between HCC and sleep disorders, this result was  
4 consistent with the previous studies on the relationship between salivary cortisol level and sleep  
5 disorders. In the Whitehall II Study, participants who reported short sleep twice showed a steeper  
6 morning rise in cortisol compared with those who never reported sleep problems<sup>20</sup>. Additionally,  
7 we found the mediating effect of HCC between shift work and sleep disorders. Because of the  
8 results in previous studies of which shift work can cause the disruption of circadian rhythm, which  
9 affects the release of cortisol and can lead to increased incidence of sleep disorders, we suggested  
10 that HCC can be taken as a biomarker for sleep disorders caused by shift work.  
11  
12

13  
14  
15 In this study, shift work, HCC and sleep disorders were analyzed together for the first time.  
16 We studied the different shift patterns separately and found their respective associations with sleep  
17 disorders and HCC. We also found the mediating effect of HCC between shift work and sleep  
18 disorders. However, some limitations were inevitable. First, a cross-sectional study can only  
19 describe the relationships among shift work, sleep disorders and HCC, but cannot explain the  
20 temporality and casual relationships among the three. Second, some important confounding  
21 factors, such as depression and stress, were not considered in this study. A cohort study with more  
22 variables measured should be performed to overcome these limitations.  
23  
24  
25  
26  
27

## 28 **Conclusion**

29  
30 In this study, we found that shift work may increase the risk of sleep disorders compared with  
31 fixed day shift work. Shift workers had higher HCC levels than day workers, and higher HCC was  
32 associated with the occurrence of sleep disorders. The mediating effect of HCC between shift  
33 work and sleep disorders was found, too. Considering the significant relationship between HCC  
34 and diabetes and hypertension<sup>21,22</sup>, HCC can be considered as an early marker of negative effect of  
35 shift work.  
36  
37  
38  
39

## 40 **Acknowledgement**

41  
42 We appreciated for the help from Xinjiang Karamay CDC and Karamay Hospital's  
43 occupational diseases department.  
44  
45  
46  
47  
48  
49  
50  
51  
52  
53  
54  
55  
56  
57  
58  
59  
60

## References

1. Grandner MA, Martin JL, Patel NP, *et al.* Age and Sleep Disturbances Among American Men And Women: Data From the U.S. Behavioral Risk Factor Surveillance System. *Sleep* 2012; **35**:395-406.doi:10.5665/sleep.1704
2. Hicklin D, Schwander J. [Shift Work and Sleep]. *Praxis*2019;**108**:119-124.doi:10.1024/1661-8157/a003163
3. Mcmenamin TM. A time to work: recent trends in shift work and flexible schedules. *Monthly Lab Rev* 2007;**130**:3-15.doi:10.1111/j.1467-8543.2007.00660.x
4. Kerkhof GA. Shift work and sleep disorder comorbidity tend to go hand in hand. *Chronobiol Int* 2017;**35**:219-228.doi:10.1080/07420528.2017.1392552
5. Kukhtina EG, Solionova LG, Fedichkina TP, *et al.* [NIGHT SHIFT WORK AND HEALTH DISORDER RISK IN FEMALE WORKERS]. *Gig Sanit* 1900;**94**:86-91.
6. Medic G, Wille M, Hemels ME. Short- and long-term health consequences of sleep disruption. *Nature and science of sleep* 2017;**9**:151-161.doi:10.2147/NSS.S134864
7. Pacák K, Palkovits M. Stressor Specificity of Central Neuroendocrine Responses: Implications for Stress-Related Disorders. *Endocr Rev*2001;**22**:502-548. doi: 10.1210/edrv.22.4.0436
8. Räikkönen K, Matthews KA, Pesonen A-K, *et al.* Poor Sleep and Altered Hypothalamic-Pituitary-Adrenocortical and Sympatho-Adrenal-Medullary System Activity in Children. *J Clin Endocrinol Metab* 2010;**95**:2254-2261.doi:10.1210/jc.2009-0943
9. George C, AlexandrosNV, Ilia K. HPA Axis and Sleep. In *Endotext*, Kenneth RF, Bradley A, Alison B, *et al.*, Eds. MDText.com, Inc.: South Dartmouth (MA), 2000.
10. Gow R, Thomson S, Rieder M, *et al.* An assessment of cortisol analysis in hair and its clinical applications. *Forensic Sci Int* 2010;**196**:32-37.doi:10.1016/j.forsciint.2009.12.040
11. Manenschijn L, van Kruysbergen RG, de Jong FH, *et al.* Shift work at young age is associated with elevated long-term cortisol levels and body mass index. *J Clin Endocrinol Metab* 2011;**96**:E1862-1865.doi:10.1210/jc.2011-1551
12. Janssens H, Clays E, Fiers T, *et al.* Hair cortisol in relation to job stress and depressive symptoms. *Occup Med* 2016;**67**:114-120.doi:10.1093/occmed/kqw114
13. Baron RM, Kenny, David A. The moderator-mediator variable distinction in social psychological research: Conceptual, strategic, and statistical considerations. *J Pers Soc Psychol* 1986;**51**:1173-1182.doi
14. Drake CL, Roehrs T, Richardson G, *et al.* Shift Work Sleep Disorder: Prevalence and Consequences Beyond that of Symptomatic Day Workers. *Sleep* 2004;**27**:1453-1462. doi:10.1093/sleep/27.8.1453
15. Akerstedt T, Nordin M, Alfredsson L, *et al.* SLEEP AND SLEEPINESS: IMPACT OF

- 1  
2  
3 ENTERING OR LEAVING SHIFTWORK—A PROSPECTIVE STUDY. *Chronobiol Int*  
4 2010;**27**:987-996.doi:10.3109/07420528.2010.489423  
5
- 6 16. Rugulies R, Norborg M, Sørensen TS, *et al.* Effort–reward imbalance at work and ris  
7 k of sleep disturbances. Cross-sectional and prospective results from the Danish Work  
8 Environment Cohort Study. *J Psychosom Res* 2009;**66**:75-83. doi: 10.1016/j.jpsychores.  
9 2008.05.005  
10
- 11 17. Ma Y, Wei F, Nie G, *et al.* Relationship between shift work schedule and self-report  
12 ed sleep quality in Chinese employees. *Chronobiol Int* 2018;**35**:261-269.doi:10.1080/07  
13 420528.2017.1399902  
14
- 15 18. Karhula K, Härmä M, Ropponen A, *et al.* Sleep and satisfaction in 8- and 12-h forward-  
16 rotating shift systems: Industrial employees prefer 12-h shifts. *Chronobiol Int* 2016;**33**:768-  
17 775.doi:10.3109/07420528.2016.1167726  
18
- 19 19. Abell JG, Stalder T, Ferrie JE, *et al.* Assessing cortisol from hair samples in a large  
20 observational cohort: The Whitehall II study. *Psychoneuroendocrinology* 2016;**73**:148-156.  
21 doi:10.1016/j.psyneuen.2016.07.214  
22
- 23 20. Abell JG, Shipley MJ, Ferrie JE, *et al.* Recurrent short sleep, chronic insomnia symptoms and  
24 salivary cortisol: A 10-year follow-up in the Whitehall II study. *Psychoneuroendocrinology*  
25 2016;**68**:91-99.doi:10.1016/j.psyneuen.2016.02.021  
26
- 27 21. Mazgelytė E KD, Linkevičiūtė A, Mažeikienė A, *et al.* Association of Hair Cortisol  
28 Concentration with Prevalence of Major Cardiovascular Risk Factors and Allostatic Load.  
29 *Med Sci Monit* 2019;**25**:3573-3582.doi:10.12659/MSM.913532  
30
- 31 22. Iob E, Andrew S. Cardiovascular Disease and Hair Cortisol: a Novel Biomarker of Chronic  
32 Stress. *Curr Cardiol Rep* 2019;**21**:116.doi:10.1007/s11886-019-1208-7  
33  
34  
35  
36  
37  
38  
39  
40  
41  
42  
43  
44  
45  
46  
47  
48  
49  
50  
51  
52  
53  
54  
55  
56  
57  
58  
59  
60

1  
2  
3 **Contributors:** YL, YZ, JS, ZZ, LS, XZ, MC, TT, JX participated in study conception and  
4 design. All authors participated in acquiring data. YL, YZ participated in drafting of manuscript.  
5 YZ, JS, ZZ, LS contributed to analysis and interpretation of data. All authors participated in the  
6 critical revision and have approved the article.  
7  
8

9 **Funding:** This work was supported by the Natural Science Foundation of Jiangsu Province,  
10 China (Grant Number: BK20171256); Qinglan Project of Jiangsu Province of China.  
11  
12

13 **Competing interests:** None declared.  
14

15 **Patient consent:** Not required.  
16

17 **Ethics approval:** All the participants signed an informed consent form after learning about  
18 research-related information. The study was approved by the Ethics Committees of Nantong  
19 University(2013-L073).  
20

21 **Provenance and peer review:** Not commissioned; externally peer reviewed.  
22

23 **Data availability:** Data relevant to the study are included in the article. Extra data are available  
24 by emailing Yulong Lian  
25  
26  
27  
28  
29  
30  
31  
32  
33  
34  
35  
36  
37  
38  
39  
40  
41  
42  
43  
44  
45  
46  
47  
48  
49  
50  
51  
52  
53  
54  
55  
56  
57  
58  
59  
60

1  
2  
3  
4  
5  
6  
7  
8  
9  
10  
11  
12  
13  
14  
15  
16  
17  
18  
19  
20  
21  
22  
23  
24  
25  
26  
27  
28  
29  
30  
31  
32  
33  
34  
35  
36  
37  
38  
39  
40  
41  
42  
43  
44  
45  
46  
47  
48  
49  
50  
51  
52  
53  
54  
55  
56  
57  
58  
59  
60

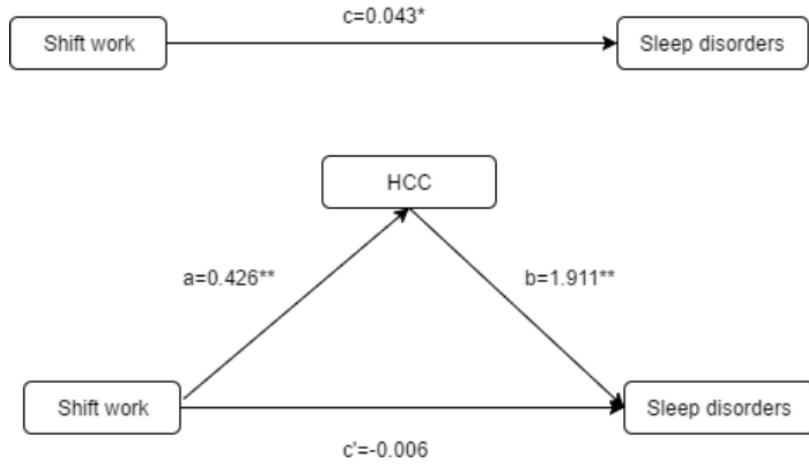

Figure 1 The mediating effect of HCC between shift work and sleep disorders  
\*:  $p<0.05$   
\*\*:  $p<0.001$

# BMJ Open

## The Relationships among Shift Work, Hair Cortisol Concentration and Sleep Disorders: A Cross-sectional Study in China

|                                 |                                                                                                                                                                                                                                                                                                                                                                                                                                                                                                                                                                                                                                                                                                                                                                                                                                                                                                                                                                                                                                                                                                                                                                                                                                                                       |
|---------------------------------|-----------------------------------------------------------------------------------------------------------------------------------------------------------------------------------------------------------------------------------------------------------------------------------------------------------------------------------------------------------------------------------------------------------------------------------------------------------------------------------------------------------------------------------------------------------------------------------------------------------------------------------------------------------------------------------------------------------------------------------------------------------------------------------------------------------------------------------------------------------------------------------------------------------------------------------------------------------------------------------------------------------------------------------------------------------------------------------------------------------------------------------------------------------------------------------------------------------------------------------------------------------------------|
| Journal:                        | <i>BMJ Open</i>                                                                                                                                                                                                                                                                                                                                                                                                                                                                                                                                                                                                                                                                                                                                                                                                                                                                                                                                                                                                                                                                                                                                                                                                                                                       |
| Manuscript ID                   | bmjopen-2020-038786.R1                                                                                                                                                                                                                                                                                                                                                                                                                                                                                                                                                                                                                                                                                                                                                                                                                                                                                                                                                                                                                                                                                                                                                                                                                                                |
| Article Type:                   | Original research                                                                                                                                                                                                                                                                                                                                                                                                                                                                                                                                                                                                                                                                                                                                                                                                                                                                                                                                                                                                                                                                                                                                                                                                                                                     |
| Date Submitted by the Author:   | 21-Sep-2020                                                                                                                                                                                                                                                                                                                                                                                                                                                                                                                                                                                                                                                                                                                                                                                                                                                                                                                                                                                                                                                                                                                                                                                                                                                           |
| Complete List of Authors:       | Zhang, Yu; Department of Epidemiology and Medical Statistics, School of Public Health, Nantong University, Nantong, Jiangsu, China<br>Shen, Jiayang; Department of Epidemiology and Medical Statistics, School of Public Health, Nantong University, Nantong, Jiangsu, China<br>Zhou, Ziqi; Department of Epidemiology and Medical Statistics, School of Public Health, Nantong University, Nantong, Jiangsu, China<br>Sang, Lingli; Department of Epidemiology and Medical Statistics, School of Public Health, Nantong University, Nantong, Jiangsu, China<br>Zhuang, Xun; Department of Epidemiology and Medical Statistics, School of Public Health, Nantong University, Nantong, Jiangsu, China<br>Chu, Minjie; Department of Epidemiology and Medical Statistics, School of Public Health, Nantong University, Nantong, Jiangsu, China<br>Tian, Tian; Department of Epidemiology and Medical Statistics, School of Public Health, Nantong University, Nantong, Jiangsu, China<br>Xiao, Jing; Department of Occupational Environmental Toxicology, School of Public Health, Nantong University, Nantong, Jiangsu, China<br>Lian, Yulong; Department of Epidemiology and Medical Statistics, School of Public Health, Nantong University, Nantong, Jiangsu, China |
| <b>Primary Subject Heading</b>: | Occupational and environmental medicine                                                                                                                                                                                                                                                                                                                                                                                                                                                                                                                                                                                                                                                                                                                                                                                                                                                                                                                                                                                                                                                                                                                                                                                                                               |
| Secondary Subject Heading:      | Occupational and environmental medicine                                                                                                                                                                                                                                                                                                                                                                                                                                                                                                                                                                                                                                                                                                                                                                                                                                                                                                                                                                                                                                                                                                                                                                                                                               |
| Keywords:                       | SLEEP MEDICINE, OCCUPATIONAL & INDUSTRIAL MEDICINE, EPIDEMIOLOGY                                                                                                                                                                                                                                                                                                                                                                                                                                                                                                                                                                                                                                                                                                                                                                                                                                                                                                                                                                                                                                                                                                                                                                                                      |
|                                 |                                                                                                                                                                                                                                                                                                                                                                                                                                                                                                                                                                                                                                                                                                                                                                                                                                                                                                                                                                                                                                                                                                                                                                                                                                                                       |

SCHOLARONE™  
Manuscripts



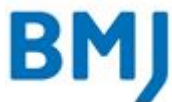

I, the Submitting Author has the right to grant and does grant on behalf of all authors of the Work (as defined in the below author licence), an exclusive licence and/or a non-exclusive licence for contributions from authors who are: i) UK Crown employees; ii) where BMJ has agreed a CC-BY licence shall apply, and/or iii) in accordance with the terms applicable for US Federal Government officers or employees acting as part of their official duties; on a worldwide, perpetual, irrevocable, royalty-free basis to BMJ Publishing Group Ltd ("BMJ") its licensees and where the relevant Journal is co-owned by BMJ to the co-owners of the Journal, to publish the Work in this journal and any other BMJ products and to exploit all rights, as set out in our [licence](#).

The Submitting Author accepts and understands that any supply made under these terms is made by BMJ to the Submitting Author unless you are acting as an employee on behalf of your employer or a postgraduate student of an affiliated institution which is paying any applicable article publishing charge ("APC") for Open Access articles. Where the Submitting Author wishes to make the Work available on an Open Access basis (and intends to pay the relevant APC), the terms of reuse of such Open Access shall be governed by a Creative Commons licence – details of these licences and which [Creative Commons](#) licence will apply to this Work are set out in our licence referred to above.

Other than as permitted in any relevant BMJ Author's Self Archiving Policies, I confirm this Work has not been accepted for publication elsewhere, is not being considered for publication elsewhere and does not duplicate material already published. I confirm all authors consent to publication of this Work and authorise the granting of this licence.

1  
2  
3  
4 **The Relationships among Shift Work, Hair Cortisol Concentration and Sleep Disorders: A**  
5  
6 **Cross-sectional Study in China**

7 Yu Zhang<sup>1</sup>, Jiayang Shen<sup>1</sup>, Ziqi Zhou<sup>1</sup>, Lingli Sang<sup>1</sup>, Xun Zhuang<sup>1</sup>, Minjie Chu<sup>1</sup>, Tian Tian<sup>1</sup>, Jing  
8 Xiao<sup>2</sup>, Yulong Lian<sup>1</sup>  
9

10  
11 <sup>1</sup> Department of Epidemiology and Medical Statistics, School of Public Health, Nantong University,  
12 Nantong, Jiangsu, China  
13

14  
15 <sup>2</sup> Department of Occupational Environmental Toxicology, School of Public Health, Nantong  
16 University, Nantong, Jiangsu, China  
17

18  
19  
20 **Corresponding author:**

21 Yulong Lian

22  
23 Postal address: Se Yuan Road, No. 9, Nantong, 226001, Jiangsu, China

24  
25 Phone: +86-0513-85012910

26  
27 Fax: N/A

28  
29 Email: lianyulong444@163.com

30  
31 **Key words:** shift work, hair cortisol concentration, sleep disorders, mediating effect

32  
33  
34 **Word count:** 3453  
35  
36  
37  
38  
39  
40  
41  
42  
43  
44  
45  
46  
47  
48  
49  
50  
51  
52  
53  
54  
55  
56  
57  
58  
59  
60

# The Relationships among Shift Work, Hair Cortisol Concentration and Sleep Disorders: A Cross-sectional Study in China

## Abstract

**Objective** The present study was designed to demonstrate the relationships among shift work, hair cortisol concentration (HCC) and sleep disorders.

**Design** A cross-sectional study.

**Setting** 3 petroleum administrations in Karamay city of Xinjiang, China.

**Participants** 435 individuals including 164 males and 271 females participated in the research.

**Outcome measures** Information on shift work was collected by a self-administered questionnaire. HCC was determined using an automatic radioimmunoassay instrument. Sleep quality was measured on the Pittsburgh sleep quality index (PSQI) scale.

**Results** Shiftwork was associated with an increased prevalence of sleep disorders compared with the fixed day shift [two shifts: Odds ratio (OR)=3.11, 95% confidence intervals (95%CI)=1.57–6.19; three shifts: OR=2.87, 95%CI=1.38–5.98; four shifts: OR=2.22, 95%CI=1.17–4.18; others: OR=3.88, 95%CI=1.36–11.08]. Workers with different shift patterns had higher HCC levels than day workers [(fixed day shift: geometric mean  $\pm$  geometric standard deviation (GM $\pm$ GSD)=2.33 $\pm$ 1.65; two shifts: 3.76 $\pm$ 1.47; three shifts: 3.15 $\pm$ 1.64; four shifts: 3.81 $\pm$ 1.55; others: 3.60 $\pm$ 1.33) ng/g hair,  $\eta^2=0.174$ ] and high HCC was associated with the higher prevalence of sleep disorders (OR=4.46, 95%CI=2.70-7.35). The mediating effect of HCC on the relationship between shift work and sleep disorders was 0.25(95%CI=0.09-0.41).

**Conclusion** We found that, when compared with the fixed day shift, shiftwork was associated with both the higher HCC, and also with an increased risk of sleep disorders. High HCC was associated with the occurrence of sleep disorders. In addition, HCC had mediating effect in shift work and sleep disorders. Thus, HCC can be considered as an early marker of shiftwork circadian disruption to early detection and management of sleep disorders.

### Strengths and limitations of this study:

- As we know, this is the first study researching the mediating effect of HCC between shift work and sleep disorders.
- We used HCC reflecting the long-term cortisol exposure which is important in the etiology of chronic disease related to HPA axis activation.
- The relatively small sample size and recall bias may influence the results of the study.
- Cross-sectional study design does not allow establishing causality among shiftwork, HCC and sleep disorders.
- Some important confounding factors, such as depression and stress, were not taken into account.

## Introduction:

Sleep disorders are very common in the general population. A study of 150,000 residents of 36 US states found that the prevalence of sleep disorders for men ranged from 13.7% to 18.1%, and for women the prevalence ranged from 17.7% to 25.1%<sup>1</sup>. Shift work is an indispensable part of the lifestyle of a large proportion of the population. In Europe, about 20% of the working population, on average, work shifts although the percentage is slightly lower, at 14.7%, in Switzerland<sup>2</sup>. The percentage in Asia has been estimated to be at least 30%<sup>3</sup>. Shift work has been shown to be one of the causes of sleep disorders. The prevalence of sleep disorders in shift workers (39.0%) was significantly higher than that in day workers (24.6%) in the study by Kerkhof<sup>4</sup>. A statistically significant increase in risk of sleep disorders [Odds ratio (OR)=8.8] was observed in a study of 403 females employed in shift work and 205 females employed in administrative units of the same enterprise<sup>5</sup>. There are few studies on the relationship between different shift patterns and sleep disorders, although the findings may allow enterprises to choose shift patterns reasonably. Therefore, it is important to study this question.

Cortisol is a glucocorticoid hormone that is released by the adrenal cortex through stimulation of the hypothalamic-pituitary-adrenal (HPA) axis<sup>6</sup>. It is commonly known that cortisol is a stress hormone as it is released in larger amounts under pressure<sup>7</sup>. Present studies suggest that sleep disorders are associated with cortisol concentrations. A study testing the association between sleep and neuroendocrine activity in children proposed that the lower the children's sleep sufficiency, the higher the overall level of salivary cortisol and the smaller the decrease salivary cortisol during the day<sup>8</sup>. Insomniacs with a high degree of objective sleep disorders, when compared with individuals with a low degree of sleep disturbance, secreted a higher level of cortisol<sup>9</sup>. The secretion of cortisol fluctuates according to the circadian rhythm, and the concentration of cortisol in blood, urine and saliva is easily affected by external factors so that it does not reflect the cortisol exposure of individuals accurately<sup>10</sup>. Hair cortisol can reflect the cumulative secretion and the long-term cortisol exposure of subjects. The hair cortisol concentration (HCC) is more stable than cortisol concentrations in blood, urine and saliva<sup>10</sup>. Therefore, HCC was adopted in this study in order to obtain more accurate results. Manenschijn et

1  
2  
3  
4 al. found that shift workers had higher hair cortisol levels than day workers: 48.53 pg/mg hair vs.  
5 26.42 pg/mg hair ( $p<0.001$ ) in the group under 40. But in the group over 40, there was no  
6  
7 significant difference in HCC between shift workers and day workers<sup>11</sup>. Janssens et al. found a  
8  
9 significantly lower mean HCC in shift workers compared with day workers, adjusted for age<sup>12</sup>,  
10  
11 which is inconsistent with the proposed mechanism and most similar studies. The reasons are  
12  
13 worth exploring.  
14

15  
16 Based on previous researches, we believe that there may be a correlation between shift work,  
17  
18 HCC and sleep disorders, and that different shift patterns may have different effects on HCC and  
19  
20 sleep disorders, as different shift patterns may lead to different shift frequency, working hours and  
21  
22 rest hours. Therefore, we studied different shift patterns separately and put forward the following  
23  
24 hypotheses: (1) shift work is associated with sleep disorders; (2) employees with sleep disorders  
25  
26 have a higher level of HCC; (3) HCC is a mediating variable between shift work and sleep  
27  
28 disorders. It is also worth investigating whether the difference in HCC levels between shift  
29  
30 workers and day workers is age-related.  
31

## 32 **Methods**

### 33 **Population**

34  
35 460 workers of 3 petroleum administrations in Karamay city of Xinjiang were randomly  
36  
37 selected as a target group for the study. The sampling method was as follows: There were 5  
38  
39 factories in the 3 petroleum administrations, each with 4 teams and a total of 20 teams. These 20  
40  
41 teams were numbered, and randomly selected 10 teams according to random number table  
42  
43 method. A total of 460 petroleum workers from 10 teams were used as research objects. The  
44  
45 inclusion criteria were as follows: (i) participants aged 20–60; (ii) those who had worked for more  
46  
47 than 1 year. The exclusion criteria were as follows: (i) participants with incomplete questionnaire  
48  
49 data ( $n=15$ ); (ii) participants with previous depression, schizophrenia and other diseases that may  
50  
51 lead to sleep disorders ( $n=2$ ); (iii) participants with hair shorter than 3cm ( $n=8$ ). Finally, 435  
52  
53 individuals, 164 men and 271 women, participated in this research and their hair samples were  
54  
55 collected.  
56  
57  
58  
59  
60

## Shift work

Information on the shift work was obtained using a questionnaire. We defined the normal day shift employees as having a fixed day shift, and the others as undertaking shift work. Shift work was divided into “two shifts,” “three shifts,” “four shifts” and “others” according to the shift mode. “Two shifts” included a day shift and a night shift, 12h per shift. Considering the biological rhythm of employee, two shifts were rotated once for one or two weeks, which means that an employee would work around the clock at least twice a month. This shift pattern may lead to longer working hours and make workers more tired. “Three shifts” meant that employees were divided into three groups. There were two groups of employees worked every day (divided into day shift and night shift, 12h per shift) and one group rest. They worked in turn according to the arrangement order. “Four shifts” meant that employees were divided into four groups, three groups worked (divided into day shift, mid shift and night shift, 8h per shift) and one rest. “Others” referred to all shift patterns except the modes mentioned above.

## Sleep disorders

The Pittsburgh sleep quality index (PSQI) scale was used to assess the sleep quality of the participants over the past month. It consists of 19 self-evaluation items generating seven components: subjective sleep quality, sleep latency, sleep duration, habitual sleep efficiency, sleep disturbances, use of sleeping medication and daytime dysfunction, and five items evaluated by family members that were not counted in the total score. Each of the seven components was scored 0–3, and the total score range was 0–21. Higher scores indicated worse sleep quality. It was considered as sleep disorder if the cumulative score was more than seven.

## Hair cortisol concentration

Hair samples of 2–3 cm and 20–30 mg were collected from the hair roots of the participants. The pretreatment process for hair sampling followed the experimental procedures described in the patent “a pre-treatment method for detecting cortisol content in hair.” The hair samples were washed and exfoliated with 2–3 mL isopropanol for 5 min; the exfoliated hair samples were frozen with liquid nitrogen for more than 4 h and then crushed; the crushed hair samples were placed in centrifuge tubes, 5 mL methanol solution and 3 mL ether solution (methanol: ether volume ratio 5:3) added, and placed in a water bath at 50.8°C for 16 h for extraction and

1  
2  
3  
4 incubation. The analytical process involved mixing the hair debris by inversion several times and  
5 centrifugation at low speed (3,500 rpm) for 15 min. The supernatant was removed and put it into a  
6 4 mL Eppendorf (EP) tube; a nitrogen blower was used to dry the mixture after extraction; 2 mL  
7 phosphate buffer solution was added, and the sample placed in a refrigerator at -4°C for cold  
8 storage until the test day. A radioimmunoassay kit for detecting iodine [<sup>125</sup>I] cortisol and an  
9 automatic radioimmunoassay instrument were used to determine HCC.

### 15 **Covariates**

16  
17 In this study, we collected covariates, including gender, age, ethnicity, education, marital  
18 status, monthly income (yuan), physical exercise, smoking status, alcohol consumption, length of  
19 service (years) and type of work, using a self-administered questionnaire. Age was divided into  
20 “<30,” “30–,” “40–” years; ethnicity was divided into “Han,” “Uighur” and “others”; education  
21 was divided into “high school and below,” “junior college” and “bachelor degree and above”;  
22 marital status was divided into “single,” “married” and “others (divorced, widowed and  
23 remarried)”; monthly income (yuan) was divided into “<3,000,” “3,000–5,000” and “≥5000”;  
24 physical exercise was divided into “never,” “<3 times/week,” “≥3 times/week” and “irregular”  
25 according to the frequency; smoking status was divided into “frequently” (≥1 cigarette/day),  
26 “occasionally” (<1 cigarette/day), “quitted” and “never”; alcohol consumption was quantified in  
27 “g” for beer, rice wine, red wine, white wine, etc. and divided into “frequently” (≥8 g/day),  
28 “occasionally,” (<8 g/day) “quitted” and “never”; length of service (years) was divided into “<20”  
29 and “≥20”; type of work was divided into “oil transportation,” “oil extraction,” “refinery” and  
30 “others.”

### 44 **Statistical analysis**

45  
46 Hair cortisol concentrations were log transformed to obtain a normal distribution and were  
47 presented in Table 1 as the median [first quartile (Q<sub>1</sub>)-third quartile (Q<sub>3</sub>)] and geometric mean ±  
48 geometric standard deviation (GM±GSD) of the original HCC. Binary logistic regression was  
49 used to calculate descriptive statistics for demographic variables, compared between those with  
50 and without sleep disorders. Variance analysis and the student *t* test were used to estimate the  
51 relationships between demographic variables and transformed HCC. Cohen’ *d* and  $\eta^2$  were used to  
52 describe the effect sizes of *t* tests and variance analyses.  
53  
54  
55  
56  
57  
58  
59  
60



1  
2  
3  
4 Logistic regression was used to estimate the difference in the prevalence of sleep disorders  
5 between shift workers and day workers. "Shift work" was divided into 5 groups according to the  
6 shift patterns and entered into the logistic model as an independent variable, and the referent level  
7 was "fixed day shift". As previous studies showed that high HCC level may related to sleep  
8 disorders, while the normal reference range of HCC has not been confirmed. When we analyzed  
9 the relationship between HCC and sleep disorders, HCCs were divided into "low and intermediate  
10 HCC" (referent level) and "high HCC" at the  $Q_3(4.71\text{ng/g hair})$  threshold as an independent  
11 variable. Model 1 analyzed the relationship between shift work or HCC and sleep disorders  
12 without adjusting for any covariables; Model 2 adjusted for gender, age, ethnicity, education,  
13 marital status, monthly income, type of work, and length of service. Model 3 adjusted for smoking  
14 status, alcohol consumption and physical exercise with the covariates in Model 2.

15  
16  
17  
18  
19  
20  
21  
22  
23  
24  
25 Mediation analysis is conducted to understand the mechanisms through which one variable  
26 influence another. The coefficient between shift work and sleep disorders is the total effect. The  
27 direct effect is the coefficient between shift work and sleep disorders with HCC as a mediator. The  
28 mediating effect, that is, indirect effect can be obtained by subtracting the direct effect from the  
29 total effect<sup>13</sup>. The Karlson, Holm and Breen (KHB) method<sup>14</sup> is a general decomposition method  
30 that is unaffected by the rescaling or attenuation bias that arises in cross-model comparisons in  
31 nonlinear models. We used the method to verify the significance of mediating effect of HCC by  
32 decomposing the direct effect and indirect effect. HCC fully mediated the relationship between  
33 shift work and sleep disorders when the total effect and the indirect effect are significant while the  
34 direct effect is not<sup>15</sup>, but it acts as a part mediator when the effect are all significant<sup>16</sup>. In this  
35 study, shift work was divided into two categories named "day workers" (referent level) and "shift  
36 workers" as an independent variable. HCCs were divided into "low and intermediate HCC"  
37 (referent level) and "high HCC" at the  $Q_3$  threshold as a mediator. Percentage of the total effect  
38 that is mediated by HCC will be obtained by the method. All analyses were carried out in Stata  
39 13.0.  $\alpha=0.05$  (two-tailed).

40  
41  
42  
43  
44  
45  
46  
47  
48  
49  
50  
51  
52  
53  
54  
55  
56  
57  
58  
59  
60

## Ethical considerations

All the participants signed an informed consent form after learning about research-related information. The study was approved by the Ethics Committees of Nantong University(2013-L073).

## Patient and Public Involvement

No patient involved.

## Results

A total of 435 employees were included in this research, of whom 127(29.20%) were fixed day workers, 87(20%) were two-shift workers, 64(14.71%) were three-shift workers, 135(31.03%) were four-shift workers and 22(5.06%) were other workers. The age range was 20–58 years, with an average age of  $38.32 \pm 7.42$  years. A total of 124 participants had sleep disorders in this study, of whom 21 were fixed day workers, 40 were two-shift workers, 22 were three-shift workers, 32 were four shift workers and 9 were other workers. The original HCC range was 1.07–9.67 ng/g hair and the median was 3.20 (2.15-4.71) ng/g hair. To investigate whether the demographic characteristics were associated with sleep disorders or with HCC level, we analyzed these factors separately but we didn't find significant differences (**Supplementary Table 1**).

In present study, HCC levels of workers with different shift patterns were significantly higher than that of fixed day shift workers [(fixed day shift:  $GM \pm GSD = 2.33 \pm 1.65$ ; two shifts:  $3.76 \pm 1.47$ ; three shifts:  $3.15 \pm 1.64$ ; four shifts:  $3.81 \pm 1.55$ ; others:  $3.60 \pm 1.33$ ) ng/g hair,  $\eta^2 = 0.174$ ]. But we didn't find the relationship among workers with two shifts, three shifts, four shifts and others in HCC (**Table 1**).

The prevalence rates of sleep disorders of different shift patterns was significantly higher than which of fixed day shift (two shifts:  $OR = 2.94$ , 95% confidence intervals (95%CI) = 1.55–5.57; three shifts:  $OR = 2.64$ , 95%CI = 1.32–5.31; four shifts:  $OR = 2.12$ , 95%CI = 1.17–3.86; others:  $OR = 3.50$ , 95%CI = 1.32–9.22). In order to control the influence of demographic characteristics on sleep disorders, we set up logistic regression models to adjust for covariates, and the results remained statistically significant. However, there was no significant difference in the prevalence of sleep disorders among workers with two shifts, three shifts, four shifts and others (**Table 2**).

1  
2  
3  
4 HCCs were dichotomized at Q3(4.71ng/g hair) threshold. Compared with workers in low and  
5 intermediate HCC, the prevalence of sleep disorders of high HCC was significantly higher  
6 (OR=4.34, 95%CI=2.73-6.90). The results remained significant after controlling the covariates  
7  
8 (Table 3).  
9

10  
11 We used KHB method to assess the mediating effect of HCC between shift work and sleep  
12 disorders. We didn't find difference among different shift patterns in the prevalence of sleep  
13 disorders or in HCC level, so we dichotomized shift work and HCC. The mediating effect analysis  
14 showed that the regression coefficient between shift work and sleep disorders showed was  
15 statistically significant (B=1.04, 95%CI=0.46-1.61). The coefficients between shift work and HCC  
16 (B=1.07, 95%CI=0.47-1.66), HCC and sleep disorders (B=1.61, 95%CI=1.12-2.11) were both  
17 significant. The coefficient was also significant when HCC was added as a mediator (B=0.78,  
18 95%CI=0.20-1.36) and the mediating effect of HCC was 0.25 (95%CI=0.09-0.41) (Figure 1).  
19  
20 This means that mediating effect of HCC between shift work and sleep disorders was significant  
21 and it acts as a part mediator in the relationship. The mediating effect accounted for 24.38% of the  
22 total effect. All the results were obtained after controlling the covariates (Table 4).  
23  
24  
25  
26  
27  
28  
29  
30  
31  
32  
33  
34  
35  
36  
37  
38  
39  
40  
41  
42  
43  
44  
45  
46  
47  
48  
49  
50  
51  
52  
53  
54  
55  
56  
57  
58  
59  
60

**Table 1 The relationship between shift work and HCC**

| Shift work      | N (%)      | Original HCC                                            | Original HCC           | $\eta^2$ | <i>p</i> |
|-----------------|------------|---------------------------------------------------------|------------------------|----------|----------|
|                 |            | Median (ng/g hair)<br>(Q <sub>1</sub> -Q <sub>3</sub> ) | GM±GSD<br>(ng/g hair)  |          |          |
| Fixed day shift | 127(29.20) | 2.15(1.55-3.21)                                         | 2.33±1.65              | 0.174    | <0.001   |
| Two shifts      | 87(20.00)  | 3.61(2.94-5.25)                                         | 3.76±1.47 <sup>a</sup> |          |          |
| Three shifts    | 64(14.71)  | 3.24(2.01-4.59)                                         | 3.15±1.64 <sup>a</sup> |          |          |
| Four shifts     | 135(31.03) | 3.84(2.63-5.20)                                         | 3.81±1.55 <sup>a</sup> |          |          |
| others          | 22(5.06)   | 3.38(2.16-5.81)                                         | 3.60±1.33 <sup>a</sup> |          |          |

$\eta^2$ : the effect size of the variance analysis;

<sup>a</sup>: there was no significant difference between groups marked with the same letter

**Table 2 ORs of sleep disorder by shift type**

| Shift work      | Sleep disorders |                    | Model 1          |          | Model 2          |          | Model 3          |          |
|-----------------|-----------------|--------------------|------------------|----------|------------------|----------|------------------|----------|
|                 | n/N             | %                  | OR (95%CI)       | <i>p</i> | OR (95%CI)       | <i>p</i> | OR (95%CI)       | <i>p</i> |
| Fixed day shift | 21/127          | 16.54              | 1.00             |          | 1.00             |          | 1.00             |          |
| Two shifts      | 40/135          | 29.63 <sup>a</sup> | 2.94(1.55-5.57)  | 0.001    | 3.10(1.58-6.08)  | 0.001    | 3.11(1.57-6.19)  | 0.001    |
| Three shifts    | 22/64           | 34.38 <sup>a</sup> | 2.65(1.32-5.31)  | 0.006    | 2.86(1.39-5.89)  | 0.004    | 2.87(1.38-5.98)  | 0.005    |
| Four shifts     | 32/87           | 36.78 <sup>a</sup> | 2.13(1.176-3.86) | 0.013    | 2.23(1.19-4.18)  | 0.012    | 2.22(1.17-4.18)  | 0.014    |
| Others          | 9/22            | 40.91 <sup>a</sup> | 3.50 (1.32-9.22) | 0.011    | 3.74(1.33-10.51) | 0.012    | 3.88(1.36-11.08) | 0.011    |

Model 1: unadjusted;

Model 2: adjusted for gender, age, ethnicity, education, marital status, monthly income, type of work, and length of service;

Model 3: additionally adjusted for smoking status, alcohol consumption and physical exercise with the covariates in Model 2;

<sup>a</sup>: there was no significant difference between groups marked with the same letter

Table 3 ORs of sleep disorders by HCC

| HCC                       | Sleep disorders |       | Model 1         |          | Model 2         |          | Model 3         |          |
|---------------------------|-----------------|-------|-----------------|----------|-----------------|----------|-----------------|----------|
|                           | n/N             | %     | OR (95%CI)      | <i>p</i> | OR (95%CI)      | <i>p</i> | OR (95%CI)      | <i>p</i> |
| Low and intermediated HCC | 67/327          | 20.49 | 1.00            |          | 1.00            |          | 1.00            |          |
| High HCC                  | 57/108          | 52.78 | 4.34(2.73-6.90) | <0.001   | 4.51(2.75-7.40) | <0.001   | 4.46(2.70-7.35) | <0.001   |

Low HCC: HCC<Q<sub>3</sub>(4.71ng/g hair); High HCC: HCC≥Q<sub>3</sub>;

Model 1: unadjusted;

Model 2: adjusted for gender, age, ethnicity, education, marital status, monthly income, type of work, length of service and shift work;

Model 3: additionally adjusted for smoking status, alcohol consumption and physical exercise with the covariates in Model 2.

Table 4 The mediating effect of HCC between shift work and sleep disorders

|            | Sleep disorders | $\beta$ | SE( $\beta$ ) | <i>z</i> | <i>p</i> | 95%CI     | (%)   |
|------------|-----------------|---------|---------------|----------|----------|-----------|-------|
| Shift work | Total effect    | 1.04    | 0.30          | 3.5      | <0.001   | 0.46-1.61 |       |
|            | Direct effect   | 0.78    | 0.30          | 2.6      | 0.008    | 0.20-1.36 | 24.38 |
|            | Indirect effect | 0.25    | 0.08          | 3.1      | 0.002    | 0.09-0.41 |       |

%; percentage of mediating effect in total effect.

## Discussion

This study mainly found that shift work was related to a higher prevalence of sleep disorders, and that the HCC levels of shift workers were higher than that of day workers. We also found that workers in high HCC had higher prevalence of sleep disorders than that of workers in low and intermediated HCC. In addition, HCC acts as a part mediator in the relationship between shift work and sleep disorders.

In this study, the prevalence of sleep disorders in workers performing shift work was significantly higher than that of fixed day shift workers, which is consistent with many previous studies. Drake et al. found that the incidence of insomnia in night workers and shift workers was 18.5% and 15.7%, respectively, far higher than that in day shift workers (8.6%)<sup>17</sup>. A prospective study of 1908 individuals showed that entering a shift increased the risk of difficulty falling asleep, while leaving the shift reduced the risk<sup>18</sup>. A 5-year cohort study of 2351 Danish employees found that, compared with daytime work, the risk of sleep disorders in those with irregular working hours is higher<sup>19</sup>. Another study analyzed different shift patterns separately and showed that workers on two shifts and three shifts exhibited higher risks of sleep disorders than fixed day shift workers, and that the influence of three shifts was stronger than that of two shifts<sup>20</sup>. Workers on two shifts have more fixed working hours than other shift patterns and can extend sleep time during their days off<sup>21</sup>. However, we found no difference among workers on two shifts, three shifts, four shifts and others. While two shifts can prolong working time and make more tired, other shift patterns may increase shift frequency, which may lead to irregular sleep and sleep disorders.

Previous study in Korean firefighters indicated that the serum cortisol response was positively related to night-shift work and serum cortisol levels were different by shift schedule<sup>22</sup>. In our study, shift workers had higher HCC level compared with day workers, and the differences between different shift patterns were not statistically significant. The reason for the inconsistent results may be that serum cortisol fluctuates according to the circadian rhythm and is easily disturbed by external factors, while HCC is stable and can reflect the long-term cortisol exposure of body. Another reason may be that working hours, shift patterns and recovery hours of the participants were different in the two studies. In another study, researchers observed elevated mean HCC in participants who had a rotating shift schedule compared with those who worked only during the day at young age, but the difference was not statistically significant among participants over 40. The study inferred that it may be related with healthy work effect and selection bias<sup>11</sup>. But in another study, the difference by age group was not statistically significant<sup>23</sup>. The present finding indicates that HCC has no relation with age and the adaptability of older employees to shift work is no different from that of younger employees. And it is consistent with a review, in which the researchers didn't find the evidence for suggestion of more

1  
2  
3 shift work problems. But our finding of the relationship between shift work and HCC is  
4 inconsistent with a study on the relationship of occupational stress and HCC among Belgian  
5 workers, including 102 participants, which showed that employees working a fixed day shift have  
6 significantly higher HCC levels than those undertaking shift work<sup>12</sup>. A possible reason may be  
7 that the population studied was relatively small, which may have led to poor reliability of the  
8 result. Another reason may be that the sample consisted of all those workers who were not  
9 working in a regular daytime work regime.  
10  
11

12  
13 We found that workers with high HCC had higher prevalence of sleep disorders compared  
14 with workers with low and intermediated HCC. Although there was no report on the relationship  
15 between HCC and sleep disorders, this result was consistent with the previous studies on the  
16 relationship between salivary cortisol level and sleep disorders. In the Whitehall II Study,  
17 participants who reported short sleep twice showed a steeper morning rise in cortisol compared  
18 with those who never reported sleep problems<sup>24</sup>. Additionally, we found the mediating effect of  
19 HCC between shift work and sleep disorders. Because of the results in previous studies of which  
20 shift work can cause the disruption of circadian rhythm, which affects the release of cortisol and  
21 can lead to increased prevalence of sleep disorders, we suggested that HCC can be taken as a  
22 biomarker for sleep disorders caused by shift work. The findings underscore the importance of  
23 monitoring HCC among shift workers. There is an urgent need for development and  
24 implementation of multidisciplinary interventions focusing on the improvement of sleep quality in  
25 affected shift workers  
26  
27  
28  
29  
30  
31  
32

33 In this study, shift work, HCC and sleep disorders were analyzed together for the first time.  
34 We studied the different shift patterns separately and found their respective associations with sleep  
35 disorders and HCC. We also found the mediating effect of HCC between shift work and sleep  
36 disorders. However, some limitations were inevitable. Firstly, a total sample of 435 cannot meet  
37 the minimum sample requirement (n=476) for this study based on sample size calculation and it  
38 might lead to bias on the results. Secondly, a cross-sectional study can only describe the  
39 relationships among shift work, sleep disorders and HCC, but cannot explain the temporality and  
40 casual relationships among the three. Thirdly, demographic information and sleep quality were  
41 obtained through a self-reported questionnaire which may lead to recall bias. Finally, some  
42 important confounding factors, such as depression and stress, were not considered in this study. A  
43 cohort study with more participants and factors should be performed to overcome these  
44 limitations. Studies aiming to research other potential mediators between shift work and sleep  
45 disorders should also be conducted to improve sleep quality of shift workers.  
46  
47  
48  
49  
50  
51  
52  
53

## 54 Conclusion

55  
56 In this study, we found that shift work may increase the risk of sleep disorders compared with  
57 fixed day shift work. Shift workers had higher HCC levels than day workers, and higher HCC was  
58  
59  
60

1  
2  
3 associated with the occurrence of sleep disorders. The mediating effect of HCC between shift  
4 work and sleep disorders was found, too. Considering the significant relationship between HCC  
5 and diabetes and hypertension<sup>25,26</sup>, HCC can be considered as an early marker of negative effect of  
6 shift work.  
7  
8

## 9 10 **Acknowledgement**

11  
12 We appreciated for the help from Xinjiang Karamay CDC and Karamay Hospital's  
13 occupational diseases department.  
14  
15  
16  
17  
18  
19  
20  
21  
22  
23  
24  
25  
26  
27  
28  
29  
30  
31  
32  
33  
34  
35  
36  
37  
38  
39  
40  
41  
42  
43  
44  
45  
46  
47  
48  
49  
50  
51  
52  
53  
54  
55  
56  
57  
58  
59  
60

For peer review only



## References

1. Grandner MA, Martin JL, Patel NP, *et al.* Age and Sleep Disturbances Among American Men And Women: Data From the U.S. Behavioral Risk Factor Surveillance System. *Sleep* 2012;**35**:395-406.doi:10.5665/sleep.1704
2. Hicklin D, Schwander J. [Shift Work and Sleep]. *Praxis* 2019;**108**:119-24.doi:10.1024/1661-8157/a003163
3. Mcmenamin TM. A time to work: recent trends in shift work and flexible schedules. *Monthly Lab Rev* 2007;**130**:3-15.doi:10.1111/j.1467-8543.2007.00660.x
4. Kerkhof GA. Shift work and sleep disorder comorbidity tend to go hand in hand. *Chronobiol Int* 2017;**35**:219-28.doi:10.1080/07420528.2017.1392552
5. Kukhtina EG, Solionova LG, Fedichkina TP, *et al.* [NIGHT SHIFT WORK AND HEALTH DISORDER RISK IN FEMALE WORKERS]. *Gig Sanit* 1900;**94**:86-91.
6. Medic G, Wille M, Hemels ME. Short- and long-term health consequences of sleep disruption. *Nature and science of sleep* 2017;**9**:151-61.doi:10.2147/NSS.S134864
7. Pacák K, Palkovits M. Stressor Specificity of Central Neuroendocrine Responses: Implications for Stress-Related Disorders. *Endocr Rev* 2001;**22**:502-48.doi:10.1210/edrv.22.4.0436
8. Räikkönen K, Matthews KA, Pesonen A-K, *et al.* Poor Sleep and Altered Hypothalamic-Pituitary-Adrenocortical and Sympatho-Adrenal-Medullary System Activity in Children. *J Clin Endocrinol Metab* 2010;**95**:2254-61.doi:10.1210/jc.2009-0943
9. Chrousos G, Vgontzas AN, Kritikou I. HPA Axis and Sleep. *Endotext* 2016 Jan. <https://www.ncbi.nlm.nih.gov/books/NBK279071/#hpa-axis-sleep.abstract>
10. Gow R, Thomson S, Rieder M, *et al.* An assessment of cortisol analysis in hair and its clinical applications. *Forensic Sci Int* 2010;**196**:32-7.doi:10.1016/j.forsciint.2009.12.040
11. Manenschijn L, van Kruysbergen RG, de Jong FH, *et al.* Shift work at young age is associated with elevated long-term cortisol levels and body mass index. *J Clin Endocrinol Metab* 2011;**96**:E1862-5.doi:10.1210/jc.2011-1551
12. Janssens H, Clays E, Fiers T, *et al.* Hair cortisol in relation to job stress and depressive symptoms. *Occup Med* 2016;**67**:114-20.doi:10.1093/occmed/kqw114
13. Miocevic M, O'Rourke HP, MacKinnon DP, *et al.* Statistical properties of four effect-size measures for mediation models. *Behav Res Methods* 2018;**50**:285-301.doi:10.3758/s13428-017-0870-1
14. Kohler U, Karlson KB, Holm A. Comparing Coefficients of Nested Nonlinear Probability Models. *Stata J* 2011;**11**:420-38.doi:10.1177/1536867X1101100306
15. Judd CM, Kenny DA. Process Analysis Estimating Mediation in Treatment Evaluations. *Eval Rev* 1981;**5**:602-19.doi:10.1177/0193841X8100500502
16. Baron RM, Kenny DA. The moderator-mediator variable distinction in social psychological

- 1  
2  
3 research: Conceptual, strategic, and statistical considerations. *J Pers Soc Psychol* 1986;**51**:1173-  
4 82.doi: 10.1037//0022-3514.51.6.1173  
5  
6 17.Drake CL, Roehrs T, Richardson G, *et al.* Shift Work Sleep Disorder: Prevalence and  
7 Consequences Beyond that of Symptomatic Day Workers. *Sleep* 2004;**27**:1453-  
8 62.doi:10.1093/sleep/27.8.1453  
9  
10 18.Akerstedt T, Nordin M, Alfredsson L, *et al.* SLEEP AND SLEEPINESS: IMPACT OF  
11 ENTERING OR LEAVING SHIFTWORK—A PROSPECTIVE STUDY. *Chronobiol Int*  
12 2010;**27**:987-96.doi:10.3109/07420528.2010.489423  
13  
14 19.Rugulies R, Norborg M, Sørensen TS, *et al.* Effort–reward imbalance at work and risk of sleep  
15 disturbances. Cross-sectional and prospective results from the Danish Work Environment Cohort  
16 Study. *J Psychosom Res* 2009;**66**:75-83.doi:10.1016/j.jpsychores.2008.05.005  
17  
18 20.Ma Y, Wei F, Nie G, *et al.* Relationship between shift work schedule and self-reported sleep  
19 quality in Chinese employees. *Chronobiol Int* 2018;**35**:261-  
20 9.doi:10.1080/07420528.2017.1399902  
21  
22 21.Karhula K, Härmä M, Ropponen A, *et al.* Sleep and satisfaction in 8- and 12-h forward-  
23 rotating shift systems: Industrial employees prefer 12-h shifts. *Chronobiol Int* 2016;**33**:768-  
24 75.doi:10.3109/07420528.2016.1167726  
25  
26 22. Lim GY, Jang TW, Sim CS, *et al.* Comparison of Cortisol level by Shift Cycle in Korean  
27 Firefighters. *Int J Environ Res Public Health* 2020;**17**:4760.doi:10.3390/ijerph17134760  
28  
29 23. Abell JG, Stalder T, Ferrie JE, *et al.* Assessing cortisol from hair samples in a large  
30 observational cohort: The Whitehall II study. *Psychoneuroendocrinology* 2016;**73**:148-  
31 56.doi:10.1016/j.psyneuen.2016.07.214  
32  
33 24.Abell JG, Shipley MJ, Ferrie JE, *et al.* Recurrent short sleep, chronic insomnia symptoms and  
34 salivary cortisol: A 10-year follow-up in the Whitehall II study. *Psychoneuroendocrinology*  
35 2016;**68**:91-9.doi:10.1016/j.psyneuen.2016.02.021  
36  
37 25.Mazgelytė E, Karčiauskaitė D, Linkevičiūtė A, *et al.* Association of Hair Cortisol  
38 Concentration with Prevalence of Major Cardiovascular Risk Factors and Allostatic Load. *Med Sci*  
39 *Monit* 2019;**25**:3573-82.doi:10.12659/MSM.913532  
40  
41 26.Iob E, Steptoe A. Cardiovascular Disease and Hair Cortisol: a Novel Biomarker of Chronic  
42 Stress. *Curr Cardiol Rep* 2019;**21**:116.doi:10.1007/s11886-019-1208-7  
43  
44  
45  
46  
47  
48  
49  
50  
51  
52  
53  
54  
55  
56  
57  
58  
59  
60

1  
2  
3 **Contributors:** YL, YZ, JS, ZZ, LS, XZ, MC, TT, JX participated in study conception and  
4 design. All authors participated in acquiring data. YL, YZ participated in drafting of manuscript.  
5 YZ, JS, ZZ, LS contributed to analysis and interpretation of data. All authors participated in the  
6 critical revision and have approved the article.  
7  
8

9 **Funding:** This work was supported by the Natural Science Foundation of Jiangsu Province,  
10 China (Grant Number: BK20171256); Qinglan Project of Jiangsu Province of China (Jiangsu  
11 Provincial Education Department, <http://jyt.jiangsu.gov.cn/>).  
12

13 **Competing interests:** None declared.  
14

15 **Patient consent:** Not required.  
16

17 **Ethics approval:** All the participants signed an informed consent form after learning about  
18 research-related information. The study was approved by the Ethics Committees of Nantong  
19 University(2013-L073).  
20

21 **Provenance and peer review:** Not commissioned; externally peer reviewed.  
22

23 **Data availability:** Data relevant to the study are included in the article. Extra data are available  
24 by emailing Yulong Lian  
25  
26

### 27 **Description of Figure 1:**

28 The mediating effect of HCC between shift work and sleep disorders  
29  
30  
31  
32  
33  
34  
35  
36  
37  
38  
39  
40  
41  
42  
43  
44  
45  
46  
47  
48  
49  
50  
51  
52  
53  
54  
55  
56  
57  
58  
59  
60

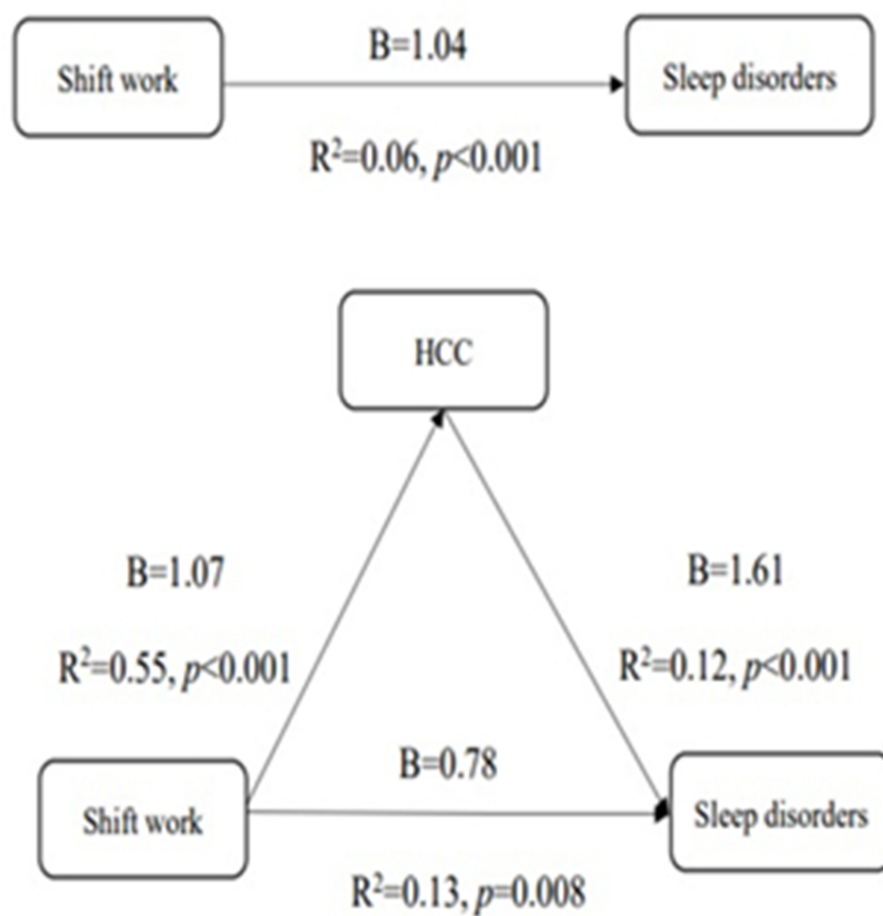

Figure 1 The mediating effect of HCC between shift work and sleep disorders

90x90mm (300 x 300 DPI)

Supplementary Table 1 The relationships among demographic characteristics, sleep disorders and HCC level

| Variables        | Sleep Disorders        |                       | OR<br>(95%CI)       | <i>p</i> | Original<br>HCC<br>Median(Q <sub>1</sub> -<br>Q <sub>3</sub> )<br>(ng/g hair) | Original<br>HCC<br>GM±GSD<br>(ng/g hair) | <i>t</i> / <i>F</i> | Cohen's<br>d/<br>η <sup>2</sup> | <i>p</i> |
|------------------|------------------------|-----------------------|---------------------|----------|-------------------------------------------------------------------------------|------------------------------------------|---------------------|---------------------------------|----------|
|                  | Yes [n (%)]<br>(n=124) | No [n (%)]<br>(n=311) |                     |          |                                                                               |                                          |                     |                                 |          |
| <b>Gender</b>    |                        |                       |                     |          |                                                                               |                                          |                     |                                 |          |
| Male             | 40(24.39)              | 124(75.61)            | 1.00                | 0.140    | 3.33<br>(2.22-5.08)                                                           | 3.28±1.67                                | 0.836               | 0.086                           | 0.403    |
| Female           | 84(31.00)              | 187(69.00)            | 1.39<br>(0.90-2.16) |          | 3.05<br>(2.11-4.55)                                                           | 3.14±1.66                                |                     |                                 |          |
| <b>Age</b>       |                        |                       |                     |          |                                                                               |                                          |                     |                                 |          |
| <30              | 19(29.23)              | 46(70.77)             | 1.00                | 0.603    | 3.41<br>(2.42-4.49)                                                           | 3.36±1.61                                | 1.134               | 0.005                           | 0.323    |
| 30-              | 40(25.64)              | 116(74.36)            | 0.84<br>(0.44-1.59) |          | 2.95<br>(2.10-4.88)                                                           | 3.05±1.66                                |                     |                                 |          |
| 40-              | 65(30.37)              | 149(69.63)            | 1.06<br>(0.58-1.94) |          | 3.24<br>(2.20-4.72)                                                           | 3.25±1.67                                |                     |                                 |          |
| <b>Ethnicity</b> |                        |                       |                     |          |                                                                               |                                          |                     |                                 |          |
| Han              | 95(27.70)              | 248(72.30)            | 1.00                | 0.718    | 3.17<br>(2.10-4.73)                                                           | 3.16±1.67                                | 0.704               | 0.003                           | 0.495    |
| Uyghur           | 14(29.79)              | 33(70.21)             | 1.11<br>(0.57-2.16) |          | 3.28<br>(2.28-4.06)                                                           | 3.24±1.63                                |                     |                                 |          |
| Others           | 15(33.33)              | 30(66.67)             | 1.30<br>(0.67-2.53) |          | 3.63<br>(2.56-4.84)                                                           | 3.47±1.60                                |                     |                                 |          |

|                                           |           |            |                     |       |                     |           |       |       |       |
|-------------------------------------------|-----------|------------|---------------------|-------|---------------------|-----------|-------|-------|-------|
| <b>Education</b>                          |           |            |                     |       |                     |           |       |       |       |
| High school and below                     | 33(32.67) | 68(67.33)  | 1.00                |       | 3.58<br>(2.26-4.86) | 3.33±1.71 |       |       |       |
| Junior college                            | 72(26.09) | 204(73.91) | 0.73<br>(0.44-1.19) | 0.340 | 3.12<br>(2.13-4.67) | 3.15±1.64 | 0.467 | 0.002 | 0.627 |
| Bachelor degree and above                 | 19(32.76) | 39(67.24)  | 1.00<br>(0.50-2.00) |       | 3.18<br>(2.33-4.19) | 3.18±1.65 |       |       |       |
| <b>Marital status</b>                     |           |            |                     |       |                     |           |       |       |       |
| Spinsterhood                              | 13(24.53) | 40(75.47)  | 1.00                |       | 3.41<br>(2.42-5.18) | 3.41±1.63 |       |       |       |
| Married                                   | 95(29.50) | 227(70.50) | 1.29<br>(0.66-2.52) | 0.716 | 3.19<br>(2.16-4.63) | 3.21±1.65 | 1.450 | 0.007 | 0.236 |
| Others<br>(divorce, widow and<br>remarry) | 16(26.67) | 44(73.33)  | 1.12<br>(0.48-2.61) |       | 3.35<br>(1.87-4.71) | 2.92±1.72 |       |       |       |
| <b>Monthly income(yuan)</b>               |           |            |                     |       |                     |           |       |       |       |
| <3000                                     | 30(32.26) | 63(67.74)  | 1.00                |       | 3.20<br>(2.20-5.06) | 3.27±1.69 |       |       |       |
| 3000-5000                                 | 87(27.62) | 228(72.38) | 0.80<br>(0.49-1.32) | 0.653 | 3.16<br>(2.14-4.55) | 3.14±1.64 | 0.846 | 0.004 | 0.430 |
| ≥5000                                     | 7(25.93)  | 20(74.07)  | 0.74<br>(0.28-1.93) |       | 3.64<br>(2.21-5.32) | 3.54±1.73 |       |       |       |
| <b>Physical exercise</b>                  |           |            |                     |       |                     |           |       |       |       |
| Never                                     | 30(30.00) | 70(70.00)  | 1.00                |       | 3.52<br>(2.06-4.94) | 3.24±1.68 | 0.794 | 0.005 | 0.497 |
| <3 times/week                             | 34(23.78) | 109(76.22) | 0.99                |       | 2.94                | 3.03±1.64 |       |       |       |

1  
2  
3  
4  
5  
6  
7  
8  
9  
10  
11  
12  
13  
14  
15  
16  
17  
18  
19  
20  
21  
22  
23  
24  
25  
26  
27  
28  
29  
30  
31  
32  
33  
34  
35  
36  
37  
38  
39  
40  
41  
42  
43  
44  
45  
46

|  |                                  |           |             |                     |             |                     |  |        |           |
|--|----------------------------------|-----------|-------------|---------------------|-------------|---------------------|--|--------|-----------|
|  |                                  |           | (0.56-1.72) |                     | (2.10-4.24) |                     |  |        |           |
|  | ≥3 times/week                    | 17(34.00) | 33(66.00)   | 0.72<br>(0.42-1.22) |             | 3.37<br>(2.38-5.41) |  |        | 3.35±1.68 |
|  | Irregular                        | 43(30.28) | 99(69.72)   | 1.19<br>(0.60-2.36) |             | 3.24<br>(2.28-4.83) |  |        | 3.27±1.68 |
|  | <b>Smoking status</b>            |           |             |                     |             |                     |  |        |           |
|  | Frequently                       | 19(22.89) | 64(77.11)   | 1.00                |             | 3.16<br>(2.11-4.96) |  |        | 3.14±1.66 |
|  | Occasionally                     | 13(24.53) | 40(75.47)   | 1.10<br>(0.49-2.46) | 0.469       | 3.28<br>(2.25-4.81) |  | 0.039  | <0.001    |
|  | Quitted                          | 7(28.00)  | 18(72.00)   | 1.31<br>(0.48-3.60) |             | 2.83<br>(2.14-5.17) |  |        | 0.990     |
|  | Never                            | 85(31.02) | 189(68.98)  | 1.52<br>(0.86-2.68) |             | 3.19<br>(2.15-4.62) |  |        | 3.21±1.66 |
|  | <b>Alcohol consumption</b>       |           |             |                     |             |                     |  |        |           |
|  | Frequently                       | 8(24.24)  | 25(75.76)   | 1.00                |             | 3.21<br>(2.18-5.08) |  |        | 3.18±1.70 |
|  | Occasionally                     | 49(29.34) | 118(70.66)  | 1.30<br>(0.55-3.08) | 0.821       | 3.34<br>(2.29-5.06) |  | 0.312  | 0.002     |
|  | Quitted                          | 5(21.74)  | 18(78.26)   | 0.87<br>(0.24-3.09) |             | 2.82<br>(2.14-5.15) |  |        | 3.03±1.79 |
|  | Never                            | 62(29.25) | 150(70.75)  | 1.29<br>(0.55-3.03) |             | 3.15<br>(2.10-4.49) |  |        | 3.15±1.64 |
|  | <b>Length of service (years)</b> |           |             |                     |             |                     |  |        |           |
|  | <20                              | 61(26.29) | 171(73.71)  | 1.00                | 0.445       | 3.11<br>(2.12-4.82) |  | -0.784 | 0.077     |

|                     |           |            |                     |                     |           |       |       |       |
|---------------------|-----------|------------|---------------------|---------------------|-----------|-------|-------|-------|
| ≥20                 | 63(31.03) | 140(68.97) | 1.26<br>(0.83-1.91) | 3.28<br>(2.21-4.68) | 3.26±1.66 |       |       |       |
| <b>Type of work</b> |           |            |                     |                     |           |       |       |       |
| Oil transportation  | 67(25.48) | 196(74.52) | 1.00                | 3.17<br>(2.10-4.66) | 3.13±1.66 |       |       |       |
| Oil extraction      | 4(23.53)  | 13(76.47)  | 0.90<br>(0.28-2.86) | 2.85<br>(2.15-4.85) | 3.03±1.84 |       |       |       |
| Refinery            | 19(29.23) | 46(70.77)  | 1.21<br>(0.66-2.21) | 3.53<br>(2.18-5.16) | 3.37±1.70 | 0.583 | 0.004 | 0.626 |
| Others              | 34(37.78) | 56(62.22)  | 1.78<br>(1.07-2.95) | 3.33<br>(2.43-4.34) | 3.30±1.62 |       |       |       |

**Yes: workers with sleep disorders; No: workers without sleep disorders; %: prevalence of sleep disorders at each row; t/F: values calculated by student *t* tests or variance analyses used transformed HCC; Cohen'd/η<sup>2</sup>: effect sizes of *t* tests and variance analyses**



1  
2  
3  
4  
5  
6  
7  
8  
9  
10  
11  
12  
13  
14  
15  
16  
17  
18  
19  
20  
21  
22  
23  
24  
25  
26  
27  
28  
29  
30  
31  
32  
33  
34  
35  
36  
37  
38  
39  
40  
41  
42  
43  
44  
45  
46  
47  
48  
49  
50  
51  
52  
53  
54  
55  
56  
57  
58  
59  
60STROBE Statement—Checklist of items that should be included in reports of *cross-sectional studies*

|                              | Item No | Recommendation                                                                                                                                                                                    | Page(line)   |
|------------------------------|---------|---------------------------------------------------------------------------------------------------------------------------------------------------------------------------------------------------|--------------|
| <b>Title and abstract</b>    | 1       | (a) Indicate the study's design with a commonly used term in the title or the abstract                                                                                                            | 2(1-3&7)     |
|                              |         | (b) Provide in the abstract an informative and balanced summary of what was done and what was found                                                                                               | 2(4-27)      |
| <b>Introduction</b>          |         |                                                                                                                                                                                                   |              |
| Background/rationale         | 2       | Explain the scientific background and rationale for the investigation being reported                                                                                                              | 4-5(1-33)    |
| Objectives                   | 3       | State specific objectives, including any prespecified hypotheses                                                                                                                                  | 5(34-41)     |
| <b>Methods</b>               |         |                                                                                                                                                                                                   |              |
| Study design                 | 4       | Present key elements of study design early in the paper                                                                                                                                           | 2(7)         |
| Setting                      | 5       | Describe the setting, locations, and relevant dates, including periods of recruitment, exposure, follow-up, and data collection                                                                   | 5(44-48)     |
| Participants                 | 6       | (a) Give the eligibility criteria, and the sources and methods of selection of participants                                                                                                       | 5(44-53)     |
| Variables                    | 7       | Clearly define all outcomes, exposures, predictors, potential confounders, and effect modifiers. Give diagnostic criteria, if applicable                                                          | 5-7(54-102)  |
| Data sources/<br>measurement | 8*      | For each variable of interest, give sources of data and details of methods of assessment (measurement). Describe comparability of assessment methods if there is more than one group              | 5-7(54-88)   |
| Bias                         | 9       | Describe any efforts to address potential sources of bias                                                                                                                                         | N/A          |
| Study size                   | 10      | Explain how the study size was arrived at                                                                                                                                                         | N/A          |
| Quantitative variables       | 11      | Explain how quantitative variables were handled in the analyses. If applicable, describe which groupings were chosen and why                                                                      | 7-8(114-118) |
| Statistical methods          | 12      | (a) Describe all statistical methods, including those used to control for confounding                                                                                                             | 7-8(103-136) |
|                              |         | (b) Describe any methods used to examine subgroups and interactions                                                                                                                               | N/A          |
|                              |         | (c) Explain how missing data were addressed                                                                                                                                                       | 5(50)        |
|                              |         | (d) If applicable, describe analytical methods taking account of sampling strategy                                                                                                                | N/A          |
|                              |         | (e) Describe any sensitivity analyses                                                                                                                                                             | N/A          |
| <b>Results</b>               |         |                                                                                                                                                                                                   |              |
| Participants                 | 13*     | (a) Report numbers of individuals at each stage of study—eg numbers potentially eligible, examined for eligibility, confirmed eligible, included in the study, completing follow-up, and analysed | 9(143-145)   |
|                              |         | (b) Give reasons for non-participation at each stage                                                                                                                                              | N/A          |
|                              |         | (c) Consider use of a flow diagram                                                                                                                                                                | N/A          |
| Descriptive data             | 14*     | (a) Give characteristics of study participants (eg demographic, clinical, social) and information on exposures and potential confounders                                                          | Table 1      |
|                              |         | (b) Indicate number of participants with missing data for each variable of interest                                                                                                               | N/A          |

|                          |     |                                                                                                                                                                                                              |                         |
|--------------------------|-----|--------------------------------------------------------------------------------------------------------------------------------------------------------------------------------------------------------------|-------------------------|
| Outcome data             | 15* | Report numbers of outcome events or summary measures                                                                                                                                                         | 9(146-148)              |
| Main results             | 16  | (a) Give unadjusted estimates and, if applicable, confounder-adjusted estimates and their precision (eg, 95% confidence interval). Make clear which confounders were adjusted for and why they were included | 11-12(1-15)             |
|                          |     | (b) Report category boundaries when continuous variables were categorized                                                                                                                                    | 9(164)                  |
|                          |     | (c) If relevant, consider translating estimates of relative risk into absolute risk for a meaningful time period                                                                                             | N/A                     |
| Other analyses           | 17  | Report other analyses done—eg analyses of subgroups and interactions, and sensitivity analyses                                                                                                               | 9-10(168-178)&12(17-18) |
| <b>Discussion</b>        |     |                                                                                                                                                                                                              |                         |
| Key results              | 18  | Summarise key results with reference to study objectives                                                                                                                                                     | 13(2-6)                 |
| Limitations              | 19  | Discuss limitations of the study, taking into account sources of potential bias or imprecision. Discuss both direction and magnitude of any potential bias                                                   | 14(57-63)               |
| Interpretation           | 20  | Give a cautious overall interpretation of results considering objectives, limitations, multiplicity of analyses, results from similar studies, and other relevant evidence                                   | 13-14(7-53)             |
| Generalisability         | 21  | Discuss the generalisability (external validity) of the study results                                                                                                                                        | 14(48-53)               |
| <b>Other information</b> |     |                                                                                                                                                                                                              |                         |
| Funding                  | 22  | Give the source of funding and the role of the funders for the present study and, if applicable, for the original study on which the present article is based                                                | 18(5-6)                 |

\*Give information separately for exposed and unexposed groups.

**Note:** An Explanation and Elaboration article discusses each checklist item and gives methodological background and published examples of transparent reporting. The STROBE checklist is best used in conjunction with this article (freely available on the Web sites of PLoS Medicine at <http://www.plosmedicine.org/>, Annals of Internal Medicine at <http://www.annals.org/>, and Epidemiology at <http://www.epidem.com/>). Information on the STROBE Initiative is available at [www.strobe-statement.org](http://www.strobe-statement.org).

# BMJ Open

## The Relationships among Shift Work, Hair Cortisol Concentration and Sleep Disorders: A Cross-sectional Study in China

|                                 |                                                                                                                                                                                                                                                                                                                                                                                                                                                                                                                                                                                                                                                                                                                                                                                                                                                                                                                                                                                                                                                                                                                                                                                                                                                                       |
|---------------------------------|-----------------------------------------------------------------------------------------------------------------------------------------------------------------------------------------------------------------------------------------------------------------------------------------------------------------------------------------------------------------------------------------------------------------------------------------------------------------------------------------------------------------------------------------------------------------------------------------------------------------------------------------------------------------------------------------------------------------------------------------------------------------------------------------------------------------------------------------------------------------------------------------------------------------------------------------------------------------------------------------------------------------------------------------------------------------------------------------------------------------------------------------------------------------------------------------------------------------------------------------------------------------------|
| Journal:                        | <i>BMJ Open</i>                                                                                                                                                                                                                                                                                                                                                                                                                                                                                                                                                                                                                                                                                                                                                                                                                                                                                                                                                                                                                                                                                                                                                                                                                                                       |
| Manuscript ID                   | bmjopen-2020-038786.R2                                                                                                                                                                                                                                                                                                                                                                                                                                                                                                                                                                                                                                                                                                                                                                                                                                                                                                                                                                                                                                                                                                                                                                                                                                                |
| Article Type:                   | Original research                                                                                                                                                                                                                                                                                                                                                                                                                                                                                                                                                                                                                                                                                                                                                                                                                                                                                                                                                                                                                                                                                                                                                                                                                                                     |
| Date Submitted by the Author:   | 11-Oct-2020                                                                                                                                                                                                                                                                                                                                                                                                                                                                                                                                                                                                                                                                                                                                                                                                                                                                                                                                                                                                                                                                                                                                                                                                                                                           |
| Complete List of Authors:       | Zhang, Yu; Department of Epidemiology and Medical Statistics, School of Public Health, Nantong University, Nantong, Jiangsu, China<br>Shen, Jiayang; Department of Epidemiology and Medical Statistics, School of Public Health, Nantong University, Nantong, Jiangsu, China<br>Zhou, Ziqi; Department of Epidemiology and Medical Statistics, School of Public Health, Nantong University, Nantong, Jiangsu, China<br>Sang, Lingli; Department of Epidemiology and Medical Statistics, School of Public Health, Nantong University, Nantong, Jiangsu, China<br>Zhuang, Xun; Department of Epidemiology and Medical Statistics, School of Public Health, Nantong University, Nantong, Jiangsu, China<br>Chu, Minjie; Department of Epidemiology and Medical Statistics, School of Public Health, Nantong University, Nantong, Jiangsu, China<br>Tian, Tian; Department of Epidemiology and Medical Statistics, School of Public Health, Nantong University, Nantong, Jiangsu, China<br>Xiao, Jing; Department of Occupational Environmental Toxicology, School of Public Health, Nantong University, Nantong, Jiangsu, China<br>Lian, Yulong; Department of Epidemiology and Medical Statistics, School of Public Health, Nantong University, Nantong, Jiangsu, China |
| <b>Primary Subject Heading</b>: | Occupational and environmental medicine                                                                                                                                                                                                                                                                                                                                                                                                                                                                                                                                                                                                                                                                                                                                                                                                                                                                                                                                                                                                                                                                                                                                                                                                                               |
| Secondary Subject Heading:      | Occupational and environmental medicine                                                                                                                                                                                                                                                                                                                                                                                                                                                                                                                                                                                                                                                                                                                                                                                                                                                                                                                                                                                                                                                                                                                                                                                                                               |
| Keywords:                       | SLEEP MEDICINE, OCCUPATIONAL & INDUSTRIAL MEDICINE, EPIDEMIOLOGY                                                                                                                                                                                                                                                                                                                                                                                                                                                                                                                                                                                                                                                                                                                                                                                                                                                                                                                                                                                                                                                                                                                                                                                                      |
|                                 |                                                                                                                                                                                                                                                                                                                                                                                                                                                                                                                                                                                                                                                                                                                                                                                                                                                                                                                                                                                                                                                                                                                                                                                                                                                                       |

SCHOLARONE™  
Manuscripts



I, the Submitting Author has the right to grant and does grant on behalf of all authors of the Work (as defined in the below author licence), an exclusive licence and/or a non-exclusive licence for contributions from authors who are: i) UK Crown employees; ii) where BMJ has agreed a CC-BY licence shall apply, and/or iii) in accordance with the terms applicable for US Federal Government officers or employees acting as part of their official duties; on a worldwide, perpetual, irrevocable, royalty-free basis to BMJ Publishing Group Ltd ("BMJ") its licensees and where the relevant Journal is co-owned by BMJ to the co-owners of the Journal, to publish the Work in this journal and any other BMJ products and to exploit all rights, as set out in our [licence](#).

The Submitting Author accepts and understands that any supply made under these terms is made by BMJ to the Submitting Author unless you are acting as an employee on behalf of your employer or a postgraduate student of an affiliated institution which is paying any applicable article publishing charge ("APC") for Open Access articles. Where the Submitting Author wishes to make the Work available on an Open Access basis (and intends to pay the relevant APC), the terms of reuse of such Open Access shall be governed by a Creative Commons licence – details of these licences and which [Creative Commons](#) licence will apply to this Work are set out in our licence referred to above.

Other than as permitted in any relevant BMJ Author's Self Archiving Policies, I confirm this Work has not been accepted for publication elsewhere, is not being considered for publication elsewhere and does not duplicate material already published. I confirm all authors consent to publication of this Work and authorise the granting of this licence.

1  
2  
3  
4 **The Relationships among Shift Work, Hair Cortisol Concentration and Sleep Disorders: A**  
5  
6 **Cross-sectional Study in China**

7 Yu Zhang<sup>1</sup>, Jiayang Shen<sup>1</sup>, Ziqi Zhou<sup>1</sup>, Lingli Sang<sup>1</sup>, Xun Zhuang<sup>1</sup>, Minjie Chu<sup>1</sup>, Tian Tian<sup>1</sup>, Jing  
8 Xiao<sup>2</sup>, Yulong Lian<sup>1</sup>  
9

10  
11 <sup>1</sup> Department of Epidemiology and Medical Statistics, School of Public Health, Nantong University,  
12 Nantong, Jiangsu, China  
13

14  
15 <sup>2</sup> Department of Occupational Environmental Toxicology, School of Public Health, Nantong  
16 University, Nantong, Jiangsu, China  
17

18  
19  
20 **Corresponding author:**

21 Yulong Lian

22  
23 Postal address: Se Yuan Road, No. 9, Nantong, 226001, Jiangsu, China

24  
25 Phone: +86-0513-85012910

26  
27 Fax: N/A

28  
29 Email: lianyulong444@163.com

30  
31 **Key words:** shift work, hair cortisol concentration, sleep disorders, mediating effect

32  
33  
34 **Word count:** 3512  
35  
36  
37  
38  
39  
40  
41  
42  
43  
44  
45  
46  
47  
48  
49  
50  
51  
52  
53  
54  
55  
56  
57  
58  
59  
60

# The Relationships among Shift Work, Hair Cortisol Concentration and Sleep Disorders: A Cross-sectional Study in China

## Abstract

**Objective** The present study was designed to demonstrate the relationships among shift work, hair cortisol concentration (HCC) and sleep disorders.

**Design** A cross-sectional study.

**Setting** 3 petroleum administrations in Karamay city of Xinjiang, China.

**Participants** 435 individuals including 164 males and 271 females participated in the research.

**Outcome measures** Information on shift work was collected by a self-administered questionnaire. HCC was determined using an automatic radioimmunoassay instrument. Sleep quality was measured on the Pittsburgh sleep quality index (PSQI) scale.

**Results** Shiftwork was associated with an increased prevalence of sleep disorders compared with the fixed day shift [two shifts: Odds ratio (OR)=3.11, 95% confidence intervals (95%CI)=1.57–6.19; three shifts: OR=2.87, 95%CI=1.38–5.98; four shifts: OR=2.22, 95%CI=1.17–4.18; others: OR=3.88, 95%CI=1.36–11.08]. Workers with different shift patterns had higher HCC levels than day workers [(fixed day shift: geometric mean  $\pm$  geometric standard deviation (GM $\pm$ GSD)=2.33 $\pm$ 1.65; two shifts: 3.76 $\pm$ 1.47; three shifts: 3.15 $\pm$ 1.64; four shifts: 3.81 $\pm$ 1.55; others: 3.60 $\pm$ 1.33) ng/g hair,  $\eta^2=0.174$ ] and high HCC was associated with the higher prevalence of sleep disorders (OR=4.46, 95%CI=2.70-7.35). The mediating effect of HCC on the relationship between shift work and sleep disorders was 0.25(95%CI=0.09-0.41).

**Conclusion** We found that, when compared with the fixed day shift, shiftwork was associated with both the higher HCC, and also with an increased risk of sleep disorders. High HCC was associated with the occurrence of sleep disorders. In addition, HCC had mediating effect in shift work and sleep disorders. Thus, HCC can be considered as an early marker of shiftwork circadian disruption to early detection and management of sleep disorders.

### Strengths and limitations of this study:

- As we know, this is the first study researching the mediating effect of HCC between shift work and sleep disorders.
- We used HCC reflecting the long-term cortisol exposure which is important in the etiology of chronic disease related to HPA axis activation.
- The relatively small sample size and recall bias may influence the results of the study.
- Cross-sectional study design does not allow establishing causality among shiftwork, HCC and sleep disorders.
- Some important confounding factors, such as depression and stress, were not taken into account.

## Introduction:

Sleep disorders are very common in the general population. A study of 150,000 residents of 36 US states found that the prevalence of sleep disorders for men ranged from 13.7% to 18.1%, and for women the prevalence ranged from 17.7% to 25.1%<sup>1</sup>. Shift work is an indispensable part of the lifestyle of a large proportion of the population. In Europe, about 20% of the working population, on average<sup>2</sup>. The percentage in Asia has been estimated to be at least 30%<sup>3</sup>. Shift work has been shown to be one of the causes of sleep disorders. The prevalence of sleep disorders in shift workers (39.0%) was significantly higher than that in day workers (24.6%) in the study by Kerkhof<sup>4</sup>. A statistically significant increase in risk of sleep disorders [Odds ratio (OR)=8.8] was observed in a study of 403 females employed in shift work and 205 females employed in administrative units of the same enterprise<sup>5</sup>. There are few studies on the relationship between different shift patterns and sleep disorders, although the findings may allow enterprises to choose shift patterns reasonably. Therefore, it is important to study this question.

Cortisol is a glucocorticoid hormone that is released by the adrenal cortex through stimulation of the hypothalamic-pituitary-adrenal (HPA) axis<sup>6</sup>. It is commonly known that cortisol is a stress hormone as it is released in larger amounts under pressure<sup>7</sup>. Present studies suggest that sleep disorders are associated with cortisol concentrations. A study testing the association between sleep and neuroendocrine activity in children proposed that the lower the children's sleep sufficiency, the higher the overall level of salivary cortisol and the smaller the decrease salivary cortisol during the day<sup>8</sup>. Insomniacs with a high degree of objective sleep disorders, when compared with individuals with a low degree of sleep disturbance, secreted a higher level of cortisol<sup>9</sup>. The secretion of cortisol fluctuates according to the circadian rhythm, and the concentration of cortisol in blood, urine and saliva is easily affected by external factors so that it does not reflect the cortisol exposure of individuals accurately<sup>10</sup>. Hair cortisol can reflect the cumulative secretion and the long-term cortisol exposure of subjects. The hair cortisol concentration (HCC) is more stable than cortisol concentrations in blood, urine and saliva<sup>10</sup>. Therefore, HCC was adopted in this study in order to obtain more accurate results. Manenschijn et al. found that shift workers had higher hair cortisol levels than day workers: 48.53 pg/mg hair vs.



1  
2  
3  
4 26.42 pg/mg hair ( $p<0.001$ ) in the group under 40. But in the group over 40, there was no  
5  
6 significant difference in HCC between shift workers and day workers<sup>11</sup>. Janssens et al. found a  
7  
8 significantly lower mean HCC in shift workers compared with day workers, adjusted for age<sup>12</sup>,  
9  
10 which is inconsistent with the proposed mechanism and most similar studies. The reasons are  
11  
12 worth exploring.

13  
14 Based on previous researches, we believe that there may be a correlation between shift work,  
15  
16 HCC and sleep disorders, and that different shift patterns may have different effects on HCC and  
17  
18 sleep disorders, as different shift patterns may lead to different shift frequency, working hours and  
19  
20 rest hours. Therefore, we studied different shift patterns separately and put forward the following  
21  
22 hypotheses: (1) shift work is associated with sleep disorders; (2) employees with sleep disorders  
23  
24 have a higher level of HCC; (3) HCC is a mediating variable between shift work and sleep  
25  
26 disorders. It is also worth investigating whether the difference in HCC levels between shift  
27  
28 workers and day workers is age-related.

## 30 **Methods**

### 32 **Population**

33  
34 460 workers of 3 petroleum administrations in Karamay city of Xinjiang were randomly  
35  
36 selected as a target group for the study. The sampling method was as follows: There were 5  
37  
38 factories in the 3 petroleum administrations, each with 4 teams and a total of 20 teams. These 20  
39  
40 teams were numbered, and randomly selected 10 teams according to random number table  
41  
42 method. A total of 460 petroleum workers from 10 teams were used as research objects. The  
43  
44 inclusion criteria were as follows: (i) participants aged 20–60; (ii) those who had worked for more  
45  
46 than 1 year. The exclusion criteria were as follows: (i) participants with incomplete questionnaire  
47  
48 data ( $n=15$ ); (ii) participants with previous depression, schizophrenia and other diseases that may  
49  
50 lead to sleep disorders ( $n=2$ ); (iii) participants with hair shorter than 3cm ( $n=8$ ). Finally, 435  
51  
52 individuals, 164 men and 271 women, participated in this research and their hair samples were  
53  
54 collected.

### 56 **Shift work**

57  
58 Information on the shift work was obtained using a questionnaire. We defined the normal day  
59  
60

1  
2  
3  
4 shift employees as having a fixed day shift, and the others as undertaking shift work. Shift work  
5  
6 was divided into “two shifts,” “three shifts,” “four shifts” and “others” according to the shift  
7  
8 mode. “Two shifts” included a day shift and a night shift, 12h per shift. Considering the biological  
9  
10 rhythm of employee, two shifts were rotated once for one or two weeks, which means that an  
11  
12 employee would work around the clock at least twice a month. This shift pattern may lead to  
13  
14 longer working hours and make workers more tired. “Three shifts” meant that employees were  
15  
16 divided into three groups. There were two groups of employees worked every day (divided into  
17  
18 day shift and night shift, 12h per shift) and one group rest. They worked in turn according to the  
19  
20 arrangement order. “Four shifts” meant that employees were divided into four groups, three  
21  
22 groups worked (divided into day shift, mid shift and night shift, 8h per shift) and one rest.  
23  
24 “Others” referred to all shift patterns except the modes mentioned above.

### 25 **Sleep disorders**

26  
27 The Pittsburgh sleep quality index (PSQI) scale was used to assess the sleep quality of the  
28  
29 participants over the past month. It consists of 19 self-evaluation items generating seven  
30  
31 components: subjective sleep quality, sleep latency, sleep duration, habitual sleep efficiency, sleep  
32  
33 disturbances, use of sleeping medication and daytime dysfunction, and five items evaluated by  
34  
35 family members that were not counted in the total score. Each of the seven components was  
36  
37 scored 0–3, and the total score range was 0–21. Higher scores indicated worse sleep quality. It was  
38  
39 considered as sleep disorder if the cumulative score was more than seven.

### 40 **Hair cortisol concentration**

41  
42 Hair samples of 2–3 cm and 20–30 mg were collected from the hair roots of the participants.  
43  
44 The pretreatment process for hair sampling followed the experimental procedures described in the  
45  
46 patent “a pre-treatment method for detecting cortisol content in hair.” The hair samples were  
47  
48 washed and exfoliated with 2–3 mL isopropanol for 5 min; the exfoliated hair samples were  
49  
50 frozen with liquid nitrogen for more than 4 h and then crushed; the crushed hair samples were  
51  
52 placed in centrifuge tubes, 5 mL methanol solution and 3 mL ether solution (methanol: ether  
53  
54 volume ratio 5:3) added, and placed in a water bath at 50.8°C for 16 h for extraction and  
55  
56 incubation. The analytical process involved mixing the hair debris by inversion several times and  
57  
58 centrifugation at low speed (3,500 rpm) for 15 min. The supernatant was removed and put it into a  
59  
60

1  
2  
3  
4 4 mL Eppendorf (EP) tube; a nitrogen blower was used to dry the mixture after extraction; 2 mL  
5 phosphate buffer solution was added, and the sample placed in a refrigerator at -4°C for cold  
6 storage until the test day. A radioimmunoassay kit for detecting iodine [<sup>125</sup>I] cortisol and an  
7 automatic radioimmunoassay instrument were used to determine HCC.  
8  
9

### 10 11 **Covariates**

12  
13 In this study, we collected covariates, including gender, age, ethnicity, education, marital  
14 status, monthly income (yuan), physical exercise, smoking status, alcohol consumption, length of  
15 service (years) and type of work, using a self-administered questionnaire. Age was divided into  
16 “<30,” “30–,” “40–” years; ethnicity was divided into “Han,” “Uighur” and “others”; education  
17 was divided into “high school and below,” “junior college” and “bachelor degree and above”;  
18 marital status was divided into “single,” “married” and “others (divorced, widowed and  
19 remarried)”; monthly income (yuan) was divided into “<3,000,” “3,000–5,000” and “≥5000”;  
20 physical exercise was divided into “never,” “<3 times/week,” “≥3 times/week” and “irregular”  
21 according to the frequency; smoking status was divided into “frequently” (≥1 cigarette/day),  
22 “occasionally” (<1 cigarette/day), “quitted” and “never”; alcohol consumption was quantified in  
23 “g” for beer, rice wine, red wine, white wine, etc. and divided into “frequently” (≥8 g/day),  
24 “occasionally,” (<8 g/day) “quitted” and “never”; length of service (years) was divided into “<20”  
25 and “≥20”; type of work was divided into “oil transportation,” “oil extraction,” “refinery” and  
26 “others.”  
27  
28  
29  
30  
31  
32  
33  
34  
35  
36  
37  
38  
39

### 40 41 **Statistical analysis**

42  
43 Hair cortisol concentrations were log transformed to obtain a normal distribution and were  
44 presented in Table 1 as the median [first quartile (Q<sub>1</sub>)-third quartile (Q<sub>3</sub>)] and geometric mean ±  
45 geometric standard deviation (GM±GSD) of the original HCC. Binary logistic regression was  
46 used to calculate descriptive statistics for demographic variables, compared between those with  
47 and without sleep disorders. Variance analysis and the student *t* test were used to estimate the  
48 relationships between demographic variables and transformed HCC. Cohen’ d and η<sup>2</sup> were used to  
49 describe the effect sizes of *t* tests and variance analyses.  
50  
51  
52  
53  
54  
55

56  
57 Logistic regression was used to estimate the difference in the prevalence of sleep disorders  
58 between shift workers and day workers. “Shift work” was divided into 5 groups according to the  
59  
60

1  
2  
3  
4 shift patterns and entered into the logistic model as an independent variable, and the referent level  
5 was “fixed day shift”. As previous studies showed that high HCC level may related to sleep  
6 disorders, while the normal reference range of HCC has not been confirmed. When we analyzed  
7 the relationship between HCC and sleep disorders, HCCs were divided into “low and intermediate  
8 HCC” (referent level) and “high HCC” at the  $Q_3(4.71\text{ng/g hair})$  threshold as an independent  
9 variable. Model 1 analyzed the relationship between shift work or HCC and sleep disorders  
10 without adjusting for any covariables; Model 2 adjusted for gender, age, ethnicity, education,  
11 marital status, monthly income, type of work, and length of service. Model 3 adjusted for smoking  
12 status, alcohol consumption and physical exercise with the covariates in Model 2.

13  
14  
15  
16  
17  
18  
19  
20  
21 Mediation analysis is conducted to understand the mechanisms through which one variable  
22 influence another. The coefficient between shift work and sleep disorders is the total effect. The  
23 direct effect is the coefficient between shift work and sleep disorders with HCC as a mediator. The  
24 mediating effect, that is, indirect effect can be obtained by subtracting the direct effect from the  
25 total effect<sup>13</sup>. The Karlson, Holm and Breen (KHB) method<sup>14</sup> is a general decomposition method  
26 that is unaffected by the rescaling or attenuation bias that arises in cross-model comparisons in  
27 nonlinear models. We used the method to verify the significance of mediating effect of HCC by  
28 decomposing the direct effect and indirect effect (**Supplementary material**). HCC fully mediated  
29 the relationship between shift work and sleep disorders when the total effect and the indirect effect  
30 are significant while the direct effect is not<sup>15</sup>, but it acts as a part mediator when the effect are all  
31 significant<sup>16</sup>. In this study, shift work was divided into two categories named “day workers”  
32 (referent level) and “shift workers” as an independent variable. HCCs were divided into “low and  
33 intermediate HCC” (referent level) and “high HCC” at the  $Q_3$  threshold as a mediator. Percentage  
34 of the total effect that is mediated by HCC will be obtained by the method. All analyses were  
35 carried out in Stata 13.0.  $\alpha=0.05$  (two-tailed).

### 50 **Ethical considerations**

51  
52 All the participants signed an informed consent form after learning about research-related  
53 information. The study was approved by the Ethics Committees of Nantong University(2013-  
54 L073).

## Patient and Public Involvement

No patient involved.

## Results

A total of 435 employees were included in this research, of whom 127(29.20%) were fixed day workers, 87(20%) were two-shift workers, 64(14.71%) were three-shift workers, 135(31.03%) were four-shift workers and 22(5.06%) were other workers. The age range was 20–58 years, with an average age of  $38.32 \pm 7.42$  years. A total of 124 participants had sleep disorders in this study, of whom 21 were fixed day workers, 40 were two-shift workers, 22 were three-shift workers, 32 were four shift workers and 9 were other workers. The original HCC range was 1.07–9.67 ng/g hair and the median was 3.20 (2.15–4.71) ng/g hair. To investigate whether the demographic characteristics were associated with sleep disorders or with HCC level, we analyzed these factors separately but we didn't find significant differences (**Supplementary Table 1**).

In present study, HCC levels of workers with different shift patterns were significantly higher than that of fixed day shift workers [(fixed day shift:  $GM \pm GSD = 2.33 \pm 1.65$ ; two shifts:  $3.76 \pm 1.47$ ; three shifts:  $3.15 \pm 1.64$ ; four shifts:  $3.81 \pm 1.55$ ; others:  $3.60 \pm 1.33$ ) ng/g hair,  $\eta^2 = 0.174$ ]. But we didn't find the relationship among workers with two shifts, three shifts, four shifts and others in HCC. As previous study showed that shift workers had higher HCC than day workers in the group under 40 and the difference was not statistically significant in the group over 40, we divided the workers into two groups at the age of 40<sup>11</sup>, and analyzed the differences in HCC among workers with different shift patterns. The results were consistent with those without grouping (**Table 1**).

The prevalence rates of sleep disorders of different shift patterns was significantly higher than which of fixed day shift (two shifts: OR=2.94, 95% confidence intervals (95%CI)=1.55–5.57; three shifts: OR=2.64, 95%CI=1.32–5.31; four shifts: OR=2.12, 95%CI=1.17–3.86; others: OR=3.50, 95%CI=1.32–9.22). In order to control the influence of demographic characteristics on sleep disorders, we set up logistic regression models to adjust for covariates, and the results remained statistically significant. However, there was no significant difference in the prevalence of sleep disorders among workers with two shifts, three shifts, four shifts and others (

**Table 2**).

1  
2  
3  
4 HCCs were dichotomized at Q3(4.71ng/g hair) threshold. Compared with workers in low and  
5 intermediate HCC, the prevalence of sleep disorders of high HCC was significantly higher  
6 (OR=4.34, 95%CI=2.73-6.90). The results remained significant after controlling the covariates  
7  
8  
9  
10 **(Table 3)**.

11 We used KHB method to assess the mediating effect of HCC between shift work and sleep  
12 disorders. We didn't find difference among different shift patterns in the prevalence of sleep  
13 disorders or in HCC level, so we dichotomized shift work and HCC. The mediating effect analysis  
14 showed that the regression coefficient between shift work and sleep disorders showed was  
15 statistically significant [B(95%CI)=1.04(0.46-1.61); OR(95%CI)=2.82(1.58-5.02)]. The  
16 coefficients between shift work and HCC [B(95%CI)=1.07(0.47-1.66); OR(95%CI)=2.91(1.61-  
17 5.25)], HCC and sleep disorders [B(95%CI)=1.61(1.12-2.11); OR(95%CI)=5.02(3.06-8.26)] were  
18 both significant. The coefficient was also significant when HCC was added as a mediator  
19 [B(95%CI)=0.78(0.20-1.36); OR(95%CI)=2.19(1.23-3.91)] and the mediating effect of HCC was  
20 0.25 [(95%CI=0.09-0.41; OR(95%CI)=1.29(1.10-1.51)] (**Figure 1**). This means that mediating  
21 effect of HCC between shift work and sleep disorders was significant and it acts as a part mediator  
22 in the relationship. The mediating effect accounted for 24.38% of the total effect. All the results  
23 were obtained after controlling the covariates (**Table 4**).

24  
25  
26  
27  
28  
29  
30  
31  
32  
33  
34  
35  
36  
37  
38  
39  
40  
41  
42  
43  
44  
45  
46  
47  
48  
49  
50  
51  
52  
53  
54  
55  
56  
57  
58  
59  
60

**Table 1 The relationship between shift work and HCC**

| Shift work      | N (%)      | Original HCC<br>Median (Q <sub>1</sub> -Q <sub>3</sub> )<br>(ng/g hair) | Original HCC<br>GM±GSD<br>(ng/g hair) |                        |                        |
|-----------------|------------|-------------------------------------------------------------------------|---------------------------------------|------------------------|------------------------|
|                 |            |                                                                         | Total                                 | <40                    | ≥40                    |
| Fixed day shift | 127(29.20) | 2.15(1.55-3.21)                                                         | 2.33±1.65                             | 2.32±1.67              | 2.34±1.65              |
| Two shifts      | 87(20.00)  | 3.61(2.94-5.25)                                                         | 3.76±1.47 <sup>a</sup>                | 3.59±1.52 <sup>b</sup> | 3.99±1.39 <sup>c</sup> |
| Three shifts    | 64(14.71)  | 3.24(2.01-4.59)                                                         | 3.15±1.64 <sup>a</sup>                | 3.18±1.66 <sup>b</sup> | 3.12±1.63 <sup>c</sup> |
| Four shifts     | 135(31.03) | 3.84(2.63-5.20)                                                         | 3.81±1.55 <sup>a</sup>                | 3.64±1.52 <sup>b</sup> | 4.01±1.58 <sup>c</sup> |
| others          | 22(5.06)   | 3.38(2.16-5.81)                                                         | 3.60±1.33 <sup>a</sup>                | 3.45±1.66 <sup>b</sup> | 3.24±1.86 <sup>c</sup> |
|                 | $\eta^2$   |                                                                         | 0.174                                 | 0.145                  | 0.211                  |

$\eta^2$ : the effect size of the variance analysis;

<sup>a,b,c</sup>: there was no significant difference between groups marked with the same letter

**Table 2 ORs of sleep disorder by shift type**

| Shift work      | Sleep disorders |                    | Model 1          |          | Model 2          |          | Model 3          |          |
|-----------------|-----------------|--------------------|------------------|----------|------------------|----------|------------------|----------|
|                 | n/N             | %                  | OR (95%CI)       | <i>p</i> | OR (95%CI)       | <i>p</i> | OR (95%CI)       | <i>p</i> |
| Fixed day shift | 21/127          | 16.54              | 1.00             |          | 1.00             |          | 1.00             |          |
| Two shifts      | 32/87           | 36.78 <sup>a</sup> | 2.94(1.55-5.57)  | 0.001    | 3.10(1.58-6.08)  | 0.001    | 3.11(1.57-6.19)  | 0.001    |
| Three shifts    | 22/64           | 34.38 <sup>a</sup> | 2.65(1.32-5.31)  | 0.006    | 2.86(1.39-5.89)  | 0.004    | 2.87(1.38-5.98)  | 0.005    |
| Four shifts     | 40/135          | 29.63 <sup>a</sup> | 2.13(1.176-3.86) | 0.013    | 2.23(1.19-4.18)  | 0.012    | 2.22(1.17-4.18)  | 0.014    |
| Others          | 9/22            | 40.91 <sup>a</sup> | 3.50 (1.32-9.22) | 0.011    | 3.74(1.33-10.51) | 0.012    | 3.88(1.36-11.08) | 0.011    |

Model 1: unadjusted;

Model 2: adjusted for gender, age, ethnicity, education, marital status, monthly income, type of work, and length of service;

Model 3: additionally adjusted for smoking status, alcohol consumption and physical exercise with the covariates in Model 2;

<sup>a</sup>: there was no significant difference between groups marked with the same letter

Table 3 ORs of sleep disorders by HCC

| HCC                       | Sleep disorders |       | Model 1         |          | Model 2         |          | Model 3         |          |
|---------------------------|-----------------|-------|-----------------|----------|-----------------|----------|-----------------|----------|
|                           | n/N             | %     | OR (95%CI)      | <i>p</i> | OR (95%CI)      | <i>p</i> | OR (95%CI)      | <i>p</i> |
| Low and intermediated HCC | 67/327          | 20.49 | 1.00            |          | 1.00            |          | 1.00            |          |
| High HCC                  | 57/108          | 52.78 | 4.34(2.73-6.90) | <0.001   | 4.51(2.75-7.40) | <0.001   | 4.46(2.70-7.35) | <0.001   |

Low HCC: HCC<Q<sub>3</sub>(4.71ng/g hair); High HCC: HCC≥Q<sub>3</sub>;

Model 1: unadjusted;

Model 2: adjusted for gender, age, ethnicity, education, marital status, monthly income, type of work, length of service and shift work;

Model 3: additionally adjusted for smoking status, alcohol consumption and physical exercise with the covariates in Model 2.

Table 4 The mediating effect of HCC between shift work and sleep disorders

|            | Sleep disorders | B (95%CI)       | SE(β) | <i>z</i> | OR (95%CI)      | <i>p</i> | (%)   |
|------------|-----------------|-----------------|-------|----------|-----------------|----------|-------|
| Shift work | Total effect    | 1.04(0.46-1.61) | 0.30  | 3.51     | 2.82(1.58-5.02) | <0.001   |       |
|            | Direct effect   | 0.78(0.20-1.36) | 0.30  | 2.65     | 2.19(1.23-3.91) | 0.008    | 24.38 |
|            | Indirect effect | 0.25(0.09-0.41) | 0.08  | 3.10     | 1.29(1.10-1.51) | 0.002    |       |

%; percentage of mediating effect in total effect.



## Discussion

This study mainly found that shift work was related to a higher prevalence of sleep disorders, and that the HCC levels of shift workers were higher than that of day workers. We also found that workers in high HCC had higher prevalence of sleep disorders than that of workers in low and intermediated HCC. In addition, HCC acts as a part mediator in the relationship between shift work and sleep disorders.

In this study, the prevalence of sleep disorders in workers performing shift work was significantly higher than that of fixed day shift workers, which is consistent with many previous studies. Drake et al. found that the incidence of insomnia in night workers and shift workers was 18.5% and 15.7%, respectively, far higher than that in day shift workers (8.6%)<sup>17</sup>. A prospective study of 1908 individuals showed that entering a shift increased the risk of difficulty falling asleep, while leaving the shift reduced the risk<sup>18</sup>. A 5-year cohort study of 2351 Danish employees found that, compared with daytime work, the risk of sleep disorders in those with irregular working hours is higher<sup>19</sup>. Another study analyzed different shift patterns separately and showed that workers on two shifts and three shifts exhibited higher risks of sleep disorders than fixed day shift workers, and that the influence of three shifts was stronger than that of two shifts<sup>20</sup>. Workers on two shifts have more fixed working hours than other shift patterns and can extend sleep time during their days off<sup>21</sup>. However, we found no difference among workers on two shifts, three shifts, four shifts and others. While two shifts can prolong working time and make more tired, other shift patterns may increase shift frequency, which may lead to irregular sleep and sleep disorders.

Previous study in Korean firefighters indicated that the serum cortisol response was positively related to night-shift work and serum cortisol levels were different by shift schedule<sup>22</sup>. In our study, shift workers had higher HCC level compared with day workers, and the differences between different shift patterns were not statistically significant. The reason for the inconsistent results may be that serum cortisol fluctuates according to the circadian rhythm and is easily disturbed by external factors, while HCC is stable and can reflect the long-term cortisol exposure of body. Another reason may be that working hours, shift patterns and recovery hours of the participants were different in the two studies. In another study, researchers observed elevated mean HCC in participants who had a rotating shift schedule compared with those who worked only during the day at young age, but the difference was not statistically significant among participants over 40. The study inferred that it may be related with healthy work effect and selection bias<sup>11</sup>. The present finding indicates that HCC has no relation with age and the differences at each age group were consistent with those without age stratification. It is consistent with the results obtained from The Whitehall II occupational cohort study, in which the difference by age group was not statistically significant<sup>23</sup>. Additionally, researchers didn't find the evidence

1  
2  
3 for suggestion of more shift work problems with increasing age in a review<sup>24</sup>. But our finding of  
4 the relationship between shift work and HCC is inconsistent with a study on the relationship of  
5 occupational stress and HCC among Belgian workers, including 102 participants, which showed  
6 that employees working a fixed day shift have significantly higher HCC levels than those  
7 undertaking shift work<sup>12</sup>. A possible reason may be that the population studied was relatively  
8 small, which may have led to poor reliability of the result. Another reason may be that the sample  
9 consisted of all those workers who were not working in a regular daytime work regime.  
10  
11

12  
13 We found that workers with high HCC had higher prevalence of sleep disorders compared  
14 with workers with low and intermediated HCC. Although there was no report on the relationship  
15 between HCC and sleep disorders, this result was consistent with the previous studies on the  
16 relationship between salivary cortisol level and sleep disorders. In the Whitehall II Study,  
17 participants who reported short sleep twice showed a steeper morning rise in cortisol compared  
18 with those who never reported sleep problems<sup>25</sup>. Additionally, we found the mediating effect of  
19 HCC between shift work and sleep disorders. Because of the results in previous studies of which  
20 shift work can cause the disruption of circadian rhythm, which affects the release of cortisol and  
21 can lead to increased prevalence of sleep disorders, we suggested that HCC can be taken as a  
22 biomarker for sleep disorders caused by shift work. The findings underscore the importance of  
23 monitoring HCC among shift workers. There is an urgent need for development and  
24 implementation of multidisciplinary interventions focusing on the improvement of sleep quality in  
25 affected shift workers  
26  
27  
28  
29  
30  
31  
32

33 In this study, shift work, HCC and sleep disorders were analyzed together for the first time.  
34 We studied the different shift patterns separately and found their respective associations with sleep  
35 disorders and HCC. We also found the mediating effect of HCC between shift work and sleep  
36 disorders. However, some limitations were inevitable. Firstly, a total sample of 435 cannot meet  
37 the minimum sample requirement (n=476) for this study based on sample size calculation and it  
38 might lead to bias on the results. Secondly, a cross-sectional study can only describe the  
39 relationships among shift work, sleep disorders and HCC, but cannot explain the temporality and  
40 casual relationships among the three. Thirdly, demographic information and sleep quality were  
41 obtained through a self-reported questionnaire which may lead to recall bias. Finally, some  
42 important confounding factors, such as depression and stress, were not considered in this study. A  
43 cohort study with more participants and factors should be performed to overcome these  
44 limitations. Studies aiming to research other potential mediators between shift work and sleep  
45 disorders should also be conducted to improve sleep quality of shift workers.  
46  
47  
48  
49  
50  
51  
52  
53

## 54 Conclusion

55  
56 In this study, we found that shift work may increase the risk of sleep disorders compared with  
57 fixed day shift work. Shift workers had higher HCC levels than day workers, and higher HCC was  
58  
59  
60

1  
2  
3 associated with the occurrence of sleep disorders. The mediating effect of HCC between shift  
4 work and sleep disorders was found, too. Considering the significant relationship between HCC  
5 and diabetes and hypertension<sup>26,27</sup>, HCC can be considered as an early marker of negative effect of  
6 shift work.  
7  
8

## 9 10 **Acknowledgement**

11  
12 We appreciated for the help from Xinjiang Karamay CDC and Karamay Hospital's  
13 occupational diseases department.  
14  
15  
16  
17  
18  
19  
20  
21  
22  
23  
24  
25  
26  
27  
28  
29  
30  
31  
32  
33  
34  
35  
36  
37  
38  
39  
40  
41  
42  
43  
44  
45  
46  
47  
48  
49  
50  
51  
52  
53  
54  
55  
56  
57  
58  
59  
60

## References

1. Grandner MA, Martin JL, Patel NP, *et al.* Age and Sleep Disturbances Among American Men And Women: Data From the U.S. Behavioral Risk Factor Surveillance System. *Sleep* 2012;**35**:395-406.doi:10.5665/sleep.1704
2. Hicklin D, Schwander J. [Shift Work and Sleep]. *Praxis* 2019;**108**:119-24.doi:10.1024/1661-8157/a003163
3. Mcmenamin TM. A time to work: recent trends in shift work and flexible schedules. *Monthly Lab Rev* 2007;**130**:3-15.doi:10.1111/j.1467-8543.2007.00660.x
4. Kerkhof GA. Shift work and sleep disorder comorbidity tend to go hand in hand. *Chronobiol Int* 2017;**35**:219-28.doi:10.1080/07420528.2017.1392552
5. Kukhtina EG, Solionova LG, Fedichkina TP, *et al.* [NIGHT SHIFT WORK AND HEALTH DISORDER RISK IN FEMALE WORKERS]. *Gig Sanit* 2015;**94**:86-91.
6. Medic G, Wille M, Hemels ME. Short- and long-term health consequences of sleep disruption. *Nat Sci Sleep* 2017;**9**:151-61.doi:10.2147/NSS.S134864
7. Pacák K, Palkovits M. Stressor Specificity of Central Neuroendocrine Responses: Implications for Stress-Related Disorders. *Endocr Rev* 2001;**22**:502-48.doi:10.1210/edrv.22.4.0436
8. Rääkkönen K, Matthews KA, Pesonen A-K, *et al.* Poor Sleep and Altered Hypothalamic-Pituitary-Adrenocortical and Sympatho-Adrenal-Medullary System Activity in Children. *J Clin Endocrinol Metab* 2010;**95**:2254-61.doi:10.1210/jc.2009-0943
9. Chrousos G, Vgontzas AN, Kritikou I. HPA Axis and Sleep. *Endotext* 2016 Jan. <https://www.ncbi.nlm.nih.gov/books/NBK279071/#hpa-axis-sleep.abstract>
10. Gow R, Thomson S, Rieder M, *et al.* An assessment of cortisol analysis in hair and its clinical applications. *Forensic Sci Int* 2010;**196**:32-7.doi:10.1016/j.forsciint.2009.12.040
11. Manenschijn L, van Kruysbergen RG, de Jong FH, *et al.* Shift work at young age is associated with elevated long-term cortisol levels and body mass index. *J Clin Endocrinol Metab* 2011;**96**:E1862-5.doi:10.1210/jc.2011-1551
12. Janssens H, Clays E, Fiers T, *et al.* Hair cortisol in relation to job stress and depressive symptoms. *Occup Med* 2016;**67**:114-20.doi:10.1093/occmed/kqw114
13. Miocevic M, O'Rourke HP, MacKinnon DP, *et al.* Statistical properties of four effect-size measures for mediation models. *Behav Res Methods* 2018;**50**:285-301.doi:10.3758/s13428-017-0870-1
14. Kohler U, Karlson KB, Holm A. Comparing Coefficients of Nested Nonlinear Probability Models. *Stata J* 2011;**11**:420-38.doi:10.1177/1536867X1101100306
15. Judd CM, Kenny DA. Process Analysis Estimating Mediation in Treatment Evaluations. *Eval Rev* 1981;**5**:602-19.doi:10.1177/0193841X8100500502
16. Baron RM, Kenny DA. The moderator-mediator variable distinction in social psychological

- 1  
2  
3 research: Conceptual, strategic, and statistical considerations. *J Pers Soc Psychol* 1986;**51**:1173-  
4 82.doi:10.1037//0022-3514.51.6.1173  
5  
6 17.Drake CL, Roehrs T, Richardson G, *et al.* Shift Work Sleep Disorder: Prevalence and  
7 Consequences Beyond that of Symptomatic Day Workers. *Sleep* 2004;**27**:1453-  
8 62.doi:10.1093/sleep/27.8.1453  
9  
10 18.Akerstedt T, Nordin M, Alfredsson L, *et al.* SLEEP AND SLEEPINESS: IMPACT OF  
11 ENTERING OR LEAVING SHIFTWORK—A PROSPECTIVE STUDY. *Chronobiol Int*  
12 2010;**27**:987-96.doi:10.3109/07420528.2010.489423  
13  
14 19.Rugulies R, Norborg M, Sørensen TS, *et al.* Effort–reward imbalance at work and risk of sleep  
15 disturbances. Cross-sectional and prospective results from the Danish Work Environment Cohort  
16 Study. *J Psychosom Res* 2009;**66**:75-83.doi:10.1016/j.jpsychores.2008.05.005  
17  
18 20.Ma Y, Wei F, Nie G, *et al.* Relationship between shift work schedule and self-reported sleep  
19 quality in Chinese employees. *Chronobiol Int* 2018;**35**:261-  
20 9.doi:10.1080/07420528.2017.1399902  
21  
22 21.Karhula K, Härmä M, Ropponen A, *et al.* Sleep and satisfaction in 8- and 12-h forward-  
23 rotating shift systems: Industrial employees prefer 12-h shifts. *Chronobiol Int* 2016;**33**:768-  
24 75.doi:10.3109/07420528.2016.1167726  
25  
26 22.Lim GY, Jang TW, Sim CS, *et al.* Comparison of Cortisol level by Shift Cycle in Korean  
27 Firefighters. *Int J Environ Res Public Health* 2020;**17**:4760.doi:10.3390/ijerph17134760  
28  
29 23. Abell JG, Stalder T, Ferrie JE, *et al.* Assessing cortisol from hair samples in a large  
30 observational cohort: The Whitehall II study. *Psychoneuroendocrinology* 2016;**73**:148-  
31 56.doi:10.1016/j.psyneuen.2016.07.214  
32  
33 24.Blok MM, de Looze MP. What is the evidence for less shift work tolerance in older workers?  
34 *Ergonomics* 2011;**54**:221-32.doi:10.1080/00140139.2010.548876  
35  
36 25.Abell JG, Shipley MJ, Ferrie JE, *et al.* Recurrent short sleep, chronic insomnia symptoms and  
37 salivary cortisol: A 10-year follow-up in the Whitehall II study. *Psychoneuroendocrinology*  
38 2016;**68**:91-9.doi:10.1016/j.psyneuen.2016.02.021  
39  
40 26.Mazgelytė E, Karčiauskaitė D, Linkevičiūtė A, *et al.* Association of Hair Cortisol  
41 Concentration with Prevalence of Major Cardiovascular Risk Factors and Allostatic Load. *Med Sci*  
42 *Monit* 2019;**25**:3573-82.doi:10.12659/MSM.913532  
43  
44 27.Iob E, Steptoe A. Cardiovascular Disease and Hair Cortisol: a Novel Biomarker of Chronic  
45 Stress. *Curr Cardiol Rep* 2019;**21**:116.doi:10.1007/s11886-019-1208-7  
46  
47  
48  
49  
50  
51  
52  
53  
54  
55  
56  
57  
58  
59  
60

1  
2  
3 **Contributors:** YL, YZ, JS, ZZ, LS, XZ, MC, TT, JX participated in study conception and  
4 design. All authors participated in acquiring data. YL, YZ participated in drafting of manuscript.  
5 YZ, JS, ZZ, LS contributed to analysis and interpretation of data. All authors participated in the  
6 critical revision and have approved the article.  
7  
8

9 **Funding:** This work was supported by the Natural Science Foundation of Jiangsu Province,  
10 China (Grant Number: BK20171256); Qinglan Project of Jiangsu Province of China (Jiangsu  
11 Provincial Education Department, <http://jyt.jiangsu.gov.cn/>).  
12

13 **Competing interests:** None declared.  
14

15 **Patient consent:** Not required.  
16

17 **Ethics approval:** All the participants signed an informed consent form after learning about  
18 research-related information. The study was approved by the Ethics Committees of Nantong  
19 University(2013-L073).  
20

21 **Provenance and peer review:** Not commissioned; externally peer reviewed.  
22

23 **Data availability:** Data relevant to the study are included in the article. Extra data are available  
24 by emailing Yulong Lian  
25  
26

### 27 **Description of Figure 1:**

28 The mediating effect of HCC between shift work and sleep disorders  
29  
30  
31  
32  
33  
34  
35  
36  
37  
38  
39  
40  
41  
42  
43  
44  
45  
46  
47  
48  
49  
50  
51  
52  
53  
54  
55  
56  
57  
58  
59  
60

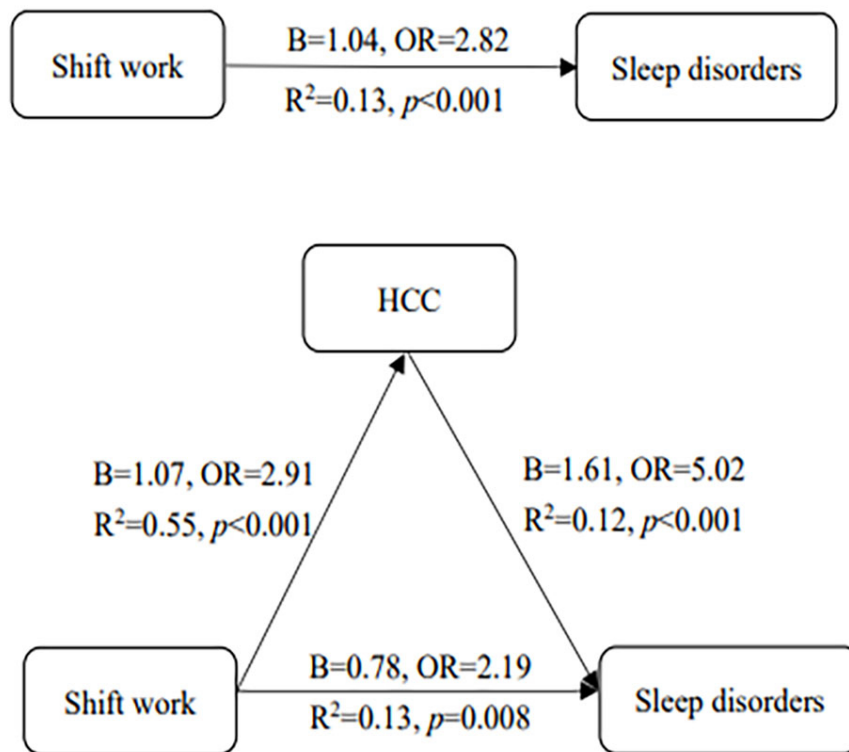

Figure 1 The mediating effect of HCC between shift work and sleep disorders

90x90mm (300 x 300 DPI)

### Supplementary material

The exact command we used in our study was as follows:

1. The command that output coefficients and related parameters:

```
khb logi sleep_disorders i.shiftwork || i.HCC, disentangle summary verbose ///  
concomitant (i.age i.gender i.ethnicity i.education i.marital_status i.monthly_income  
i.physical_exercise i.smoking_status i.alcohol_consumption i.length_of_service i.type_of_work)
```

2. The command that output ORs and related parameters:

```
khb logi sleep_disorders i.shiftwork || i.HCC, disentangle or summary verbose ///  
concomitant (i.age i.gender i.ethnicity i.education i.marital_status i.monthly_income  
i.physical_exercise i.smoking_status i.alcohol_consumption i.length_of_service i.type_of_work)
```



Supplementary Table 1 The relationships among demographic characteristics, sleep disorders and HCC level

| Variables        | Sleep Disorders        |                       | OR<br>(95%CI)       | <i>p</i> | Original<br>HCC<br>Median(Q <sub>1</sub> -<br>Q <sub>3</sub> )<br>(ng/g hair) | Original<br>HCC<br>GM±GSD<br>(ng/g hair) | <i>t</i> / <i>F</i> | Cohen's<br>d/<br>η <sup>2</sup> | <i>p</i> |
|------------------|------------------------|-----------------------|---------------------|----------|-------------------------------------------------------------------------------|------------------------------------------|---------------------|---------------------------------|----------|
|                  | Yes [n (%)]<br>(n=124) | No [n (%)]<br>(n=311) |                     |          |                                                                               |                                          |                     |                                 |          |
| <b>Gender</b>    |                        |                       |                     |          |                                                                               |                                          |                     |                                 |          |
| Male             | 40(24.39)              | 124(75.61)            | 1.00                | 0.140    | 3.33<br>(2.22-5.08)                                                           | 3.28±1.67                                | 0.836               | 0.086                           | 0.403    |
| Female           | 84(31.00)              | 187(69.00)            | 1.39<br>(0.90-2.16) |          | 3.05<br>(2.11-4.55)                                                           | 3.14±1.66                                |                     |                                 |          |
| <b>Age</b>       |                        |                       |                     |          |                                                                               |                                          |                     |                                 |          |
| <30              | 19(29.23)              | 46(70.77)             | 1.00                | 0.603    | 3.41<br>(2.42-4.49)                                                           | 3.36±1.61                                | 1.134               | 0.005                           | 0.323    |
| 30-              | 40(25.64)              | 116(74.36)            | 0.84<br>(0.44-1.59) |          | 2.95<br>(2.10-4.88)                                                           | 3.05±1.66                                |                     |                                 |          |
| 40-              | 65(30.37)              | 149(69.63)            | 1.06<br>(0.58-1.94) |          | 3.24<br>(2.20-4.72)                                                           | 3.25±1.67                                |                     |                                 |          |
| <b>Ethnicity</b> |                        |                       |                     |          |                                                                               |                                          |                     |                                 |          |
| Han              | 95(27.70)              | 248(72.30)            | 1.00                | 0.718    | 3.17<br>(2.10-4.73)                                                           | 3.16±1.67                                | 0.704               | 0.003                           | 0.495    |
| Uyghur           | 14(29.79)              | 33(70.21)             | 1.11<br>(0.57-2.16) |          | 3.28<br>(2.28-4.06)                                                           | 3.24±1.63                                |                     |                                 |          |
| Others           | 15(33.33)              | 30(66.67)             | 1.30<br>(0.67-2.53) |          | 3.63<br>(2.56-4.84)                                                           | 3.47±1.60                                |                     |                                 |          |

1  
2  
3  
4  
5  
6  
7  
8  
9  
10  
11  
12  
13  
14  
15  
16  
17  
18  
19  
20  
21  
22  
23  
24  
25  
26  
27  
28  
29  
30  
31  
32  
33  
34  
35  
36  
37  
38  
39  
40  
41  
42  
43  
44  
45  
46

| <b>Education</b>                          |           |            |                     |       |                     |           |       |       |       |
|-------------------------------------------|-----------|------------|---------------------|-------|---------------------|-----------|-------|-------|-------|
| High school and below                     | 33(32.67) | 68(67.33)  | 1.00                |       | 3.58<br>(2.26-4.86) | 3.33±1.71 |       |       |       |
| Junior college                            | 72(26.09) | 204(73.91) | 0.73<br>(0.44-1.19) | 0.340 | 3.12<br>(2.13-4.67) | 3.15±1.64 | 0.467 | 0.002 | 0.627 |
| Bachelor degree and above                 | 19(32.76) | 39(67.24)  | 1.00<br>(0.50-2.00) |       | 3.18<br>(2.33-4.19) | 3.18±1.65 |       |       |       |
| <b>Marital status</b>                     |           |            |                     |       |                     |           |       |       |       |
| Spinsterhood                              | 13(24.53) | 40(75.47)  | 1.00                |       | 3.41<br>(2.42-5.18) | 3.41±1.63 |       |       |       |
| Married                                   | 95(29.50) | 227(70.50) | 1.29<br>(0.66-2.52) | 0.716 | 3.19<br>(2.16-4.63) | 3.21±1.65 | 1.450 | 0.007 | 0.236 |
| Others<br>(divorce, widow and<br>remarry) | 16(26.67) | 44(73.33)  | 1.12<br>(0.48-2.61) |       | 3.35<br>(1.87-4.71) | 2.92±1.72 |       |       |       |
| <b>Monthly income(yuan)</b>               |           |            |                     |       |                     |           |       |       |       |
| <3000                                     | 30(32.26) | 63(67.74)  | 1.00                |       | 3.20<br>(2.20-5.06) | 3.27±1.69 |       |       |       |
| 3000-5000                                 | 87(27.62) | 228(72.38) | 0.80<br>(0.49-1.32) | 0.653 | 3.16<br>(2.14-4.55) | 3.14±1.64 | 0.846 | 0.004 | 0.430 |
| ≥5000                                     | 7(25.93)  | 20(74.07)  | 0.74<br>(0.28-1.93) |       | 3.64<br>(2.21-5.32) | 3.54±1.73 |       |       |       |
| <b>Physical exercise</b>                  |           |            |                     |       |                     |           |       |       |       |
| Never                                     | 30(30.00) | 70(70.00)  | 1.00                |       | 3.52<br>(2.06-4.94) | 3.24±1.68 | 0.794 | 0.005 | 0.497 |
| <3 times/week                             | 34(23.78) | 109(76.22) | 0.99                |       | 2.94                | 3.03±1.64 |       |       |       |

|  |                                  |           |             |                     |             |                     |           |        |        |
|--|----------------------------------|-----------|-------------|---------------------|-------------|---------------------|-----------|--------|--------|
|  |                                  |           | (0.56-1.72) |                     | (2.10-4.24) |                     |           |        |        |
|  | ≥3 times/week                    | 17(34.00) | 33(66.00)   | 0.72<br>(0.42-1.22) |             | 3.37<br>(2.38-5.41) | 3.35±1.68 |        |        |
|  | Irregular                        | 43(30.28) | 99(69.72)   | 1.19<br>(0.60-2.36) |             | 3.24<br>(2.28-4.83) | 3.27±1.68 |        |        |
|  | <b>Smoking status</b>            |           |             |                     |             |                     |           |        |        |
|  | Frequently                       | 19(22.89) | 64(77.11)   | 1.00                |             | 3.16<br>(2.11-4.96) | 3.14±1.66 |        |        |
|  | Occasionally                     | 13(24.53) | 40(75.47)   | 1.10<br>(0.49-2.46) | 0.469       | 3.28<br>(2.25-4.81) | 3.21±1.66 | 0.039  | <0.001 |
|  | Quitted                          | 7(28.00)  | 18(72.00)   | 1.31<br>(0.48-3.60) |             | 2.83<br>(2.14-5.17) | 3.20±1.78 |        | 0.990  |
|  | Never                            | 85(31.02) | 189(68.98)  | 1.52<br>(0.86-2.68) |             | 3.19<br>(2.15-4.62) | 3.21±1.66 |        |        |
|  | <b>Alcohol consumption</b>       |           |             |                     |             |                     |           |        |        |
|  | Frequently                       | 8(24.24)  | 25(75.76)   | 1.00                |             | 3.21<br>(2.18-5.08) | 3.18±1.70 |        |        |
|  | Occasionally                     | 49(29.34) | 118(70.66)  | 1.30<br>(0.55-3.08) | 0.821       | 3.34<br>(2.29-5.06) | 3.28±1.66 | 0.312  | 0.002  |
|  | Quitted                          | 5(21.74)  | 18(78.26)   | 0.87<br>(0.24-3.09) |             | 2.82<br>(2.14-5.15) | 3.03±1.79 |        |        |
|  | Never                            | 62(29.25) | 150(70.75)  | 1.29<br>(0.55-3.03) |             | 3.15<br>(2.10-4.49) | 3.15±1.64 |        |        |
|  | <b>Length of service (years)</b> |           |             |                     |             |                     |           |        |        |
|  | <20                              | 61(26.29) | 171(73.71)  | 1.00                | 0.445       | 3.11<br>(2.12-4.82) | 3.13±1.66 | -0.784 | 0.077  |

1  
2  
3  
4  
5  
6  
7  
8  
9  
10  
11  
12  
13  
14  
15  
16  
17  
18  
19  
20  
21  
22  
23  
24  
25  
26  
27  
28  
29  
30  
31  
32  
33  
34  
35  
36  
37  
38  
39  
40  
41  
42  
43  
44  
45  
46

|                     |           |            |                     |                     |           |       |       |       |
|---------------------|-----------|------------|---------------------|---------------------|-----------|-------|-------|-------|
| ≥20                 | 63(31.03) | 140(68.97) | 1.26<br>(0.83-1.91) | 3.28<br>(2.21-4.68) | 3.26±1.66 |       |       |       |
| <b>Type of work</b> |           |            |                     |                     |           |       |       |       |
| Oil transportation  | 67(25.48) | 196(74.52) | 1.00                | 3.17<br>(2.10-4.66) | 3.13±1.66 |       |       |       |
| Oil extraction      | 4(23.53)  | 13(76.47)  | 0.90<br>(0.28-2.86) | 2.85<br>(2.15-4.85) | 3.03±1.84 |       |       |       |
| Refinery            | 19(29.23) | 46(70.77)  | 1.21<br>(0.66-2.21) | 3.53<br>(2.18-5.16) | 3.37±1.70 | 0.583 | 0.004 | 0.626 |
| Others              | 34(37.78) | 56(62.22)  | 1.78<br>(1.07-2.95) | 3.33<br>(2.43-4.34) | 3.30±1.62 |       |       |       |

**Yes: workers with sleep disorders; No: workers without sleep disorders; %: prevalence of sleep disorders at each row; t/F: values calculated by student t tests or variance analyses used transformed HCC; Cohen'd/η²: effect sizes of t tests and variance analyses**

STROBE Statement—Checklist of items that should be included in reports of *cross-sectional studies*

|                              | Item No | Recommendation                                                                                                                                                                                    | Page(line)            |
|------------------------------|---------|---------------------------------------------------------------------------------------------------------------------------------------------------------------------------------------------------|-----------------------|
| <b>Title and abstract</b>    | 1       | (a) Indicate the study's design with a commonly used term in the title or the abstract                                                                                                            | 2(1-3&7)              |
|                              |         | (b) Provide in the abstract an informative and balanced summary of what was done and what was found                                                                                               | 2(4-27)               |
| <b>Introduction</b>          |         |                                                                                                                                                                                                   |                       |
| Background/rationale         | 2       | Explain the scientific background and rationale for the investigation being reported                                                                                                              | 4-5(1-32)             |
| Objectives                   | 3       | State specific objectives, including any prespecified hypotheses                                                                                                                                  | 5(33-40)              |
| <b>Methods</b>               |         |                                                                                                                                                                                                   |                       |
| Study design                 | 4       | Present key elements of study design early in the paper                                                                                                                                           | 2(7)                  |
| Setting                      | 5       | Describe the setting, locations, and relevant dates, including periods of recruitment, exposure, follow-up, and data collection                                                                   | 5(43-47)              |
| Participants                 | 6       | (a) Give the eligibility criteria, and the sources and methods of selection of participants                                                                                                       | 5(43-52)              |
| Variables                    | 7       | Clearly define all outcomes, exposures, predictors, potential confounders, and effect modifiers. Give diagnostic criteria, if applicable                                                          | 5-7(53-101)           |
| Data sources/<br>measurement | 8*      | For each variable of interest, give sources of data and details of methods of assessment (measurement). Describe comparability of assessment methods if there is more than one group              | 5-7(53-87)            |
| Bias                         | 9       | Describe any efforts to address potential sources of bias                                                                                                                                         | N/A                   |
| Study size                   | 10      | Explain how the study size was arrived at                                                                                                                                                         | N/A                   |
| Quantitative variables       | 11      | Explain how quantitative variables were handled in the analyses. If applicable, describe which groupings were chosen and why                                                                      | 7-8(113-117)          |
| Statistical methods          | 12      | (a) Describe all statistical methods, including those used to control for confounding                                                                                                             | 7-8(102-135)          |
|                              |         | (b) Describe any methods used to examine subgroups and interactions                                                                                                                               | N/A                   |
|                              |         | (c) Explain how missing data were addressed                                                                                                                                                       | 5(49)                 |
|                              |         | (d) If applicable, describe analytical methods taking account of sampling strategy                                                                                                                | N/A                   |
|                              |         | (e) Describe any sensitivity analyses                                                                                                                                                             | N/A                   |
| <b>Results</b>               |         |                                                                                                                                                                                                   |                       |
| Participants                 | 13*     | (a) Report numbers of individuals at each stage of study—eg numbers potentially eligible, examined for eligibility, confirmed eligible, included in the study, completing follow-up, and analysed | 9(142-144)            |
|                              |         | (b) Give reasons for non-participation at each stage                                                                                                                                              | N/A                   |
|                              |         | (c) Consider use of a flow diagram                                                                                                                                                                | N/A                   |
| Descriptive data             | 14*     | (a) Give characteristics of study participants (eg demographic, clinical, social) and information on exposures and potential confounders                                                          | Supplementary Table 1 |
|                              |         | (b) Indicate number of participants with missing data for each variable of interest                                                                                                               | N/A                   |

|                          |     |                                                                                                                                                                                                              |                           |
|--------------------------|-----|--------------------------------------------------------------------------------------------------------------------------------------------------------------------------------------------------------------|---------------------------|
| Outcome data             | 15* | Report numbers of outcome events or summary measures                                                                                                                                                         | 9(145-147)                |
| Main results             | 16  | (a) Give unadjusted estimates and, if applicable, confounder-adjusted estimates and their precision (eg, 95% confidence interval). Make clear which confounders were adjusted for and why they were included | 11-12(Table 1, 2, 3)      |
|                          |     | (b) Report category boundaries when continuous variables were categorized                                                                                                                                    | 9(166)                    |
|                          |     | (c) If relevant, consider translating estimates of relative risk into absolute risk for a meaningful time period                                                                                             | N/A                       |
| Other analyses           | 17  | Report other analyses done—eg analyses of subgroups and interactions, and sensitivity analyses                                                                                                               | 9-10(170-182)&12(Table 4) |
| <b>Discussion</b>        |     |                                                                                                                                                                                                              |                           |
| Key results              | 18  | Summarise key results with reference to study objectives                                                                                                                                                     | 13(2-6)                   |
| Limitations              | 19  | Discuss limitations of the study, taking into account sources of potential bias or imprecision. Discuss both direction and magnitude of any potential bias                                                   | 14(58-64)                 |
| Interpretation           | 20  | Give a cautious overall interpretation of results considering objectives, limitations, multiplicity of analyses, results from similar studies, and other relevant evidence                                   | 13-14(7-54)               |
| Generalisability         | 21  | Discuss the generalisability (external validity) of the study results                                                                                                                                        | 14(49-54)                 |
| <b>Other information</b> |     |                                                                                                                                                                                                              |                           |
| Funding                  | 22  | Give the source of funding and the role of the funders for the present study and, if applicable, for the original study on which the present article is based                                                | 18(5-7)                   |

\*Give information separately for exposed and unexposed groups.

**Note:** An Explanation and Elaboration article discusses each checklist item and gives methodological background and published examples of transparent reporting. The STROBE checklist is best used in conjunction with this article (freely available on the Web sites of PLoS Medicine at <http://www.plosmedicine.org/>, Annals of Internal Medicine at <http://www.annals.org/>, and Epidemiology at <http://www.epidem.com/>). Information on the STROBE Initiative is available at [www.strobe-statement.org](http://www.strobe-statement.org).
