# Supplementary material for: Relationships among shift work, hair cortisol concentration and sleep disorders: a cross-sectional study in China
Source: HighWire-hosted journal article supplement (doi:10.1136/bmjopen-2020-038786), 2020-11-01
Supplement: bmjopen-2020-038786supp001_data_supplement.pdf [file bmjopen-2020-038786supp001_data_supplement.pdf]

### Supplementary material

The exact command we used in our study was as follows:

1. The command that output coefficients and related parameters:

```
khb logi sleep_disorders i.shiftwork || i.HCC, disentangle summary verbose ///  
concomitant (i.age i.gender i.ethnicity i.education i.marital_status i.monthly_income  
i.physical_exercise i.smoking_status i.alcohol_consumption i.length_of_service i.type_of_work)
```

2. The command that output ORs and related parameters:

```
khb logi sleep_disorders i.shiftwork || i.HCC, disentangle or summary verbose ///  
concomitant (i.age i.gender i.ethnicity i.education i.marital_status i.monthly_income  
i.physical_exercise i.smoking_status i.alcohol_consumption i.length_of_service i.type_of_work)
```
